# Supplementary material for: Reactivation of CTLA4-expressing T cells accelerates resolution of lung fibrosis in a humanized mouse model
Source: J Clin Invest. 2025 Mar 18;135(10):e181775. doi: 10.1172/JCI181775 (PMC12077895; doi:10.1172/JCI181775)
Supplement: Supporting data values [file jci-135-181775-s246.xlsx]

## Sheet: Fig 1C & I
Target name	Log2	Pvalue	Adjusted pvalue	-log10 pvalue
TPI1	-0.678743	0.0011323		2.94604
DGKD	-0.287535	0.108265		0.965512
CTNNBL1	0.0445167	0.814974		0.0888564
MIGA1	0.0509754	0.652785		0.18523
CBX5	-0.376208	0.0208908		1.68005
STIMATE	-0.0454355	0.651387		0.186161
SLC25A1	-0.108792	0.237017		0.625221
CALD1	-1.71116	5.25376e-05		4.27953
ZBTB44	-0.0820267	0.506262		0.295624
SOCS6	0.163841	0.432581		0.363932
RNF128	0.000193592	0.650341		0.186859
PKIG	-0.270937	0.0894148		1.04859
SPATA31D1	0.469166	0.074705		1.12665
STX18	0.247918	0.229243		0.639704
SLC12A5	-0.024739	0.955361		0.0198325
ARL4A	0.280729	0.144926		0.838853
DNPH1	0.221891	0.719152		0.143179
OLFM3	0.302224	0.364923		0.437798
MYCL	0.195935	0.577776		0.23824
PLSCR1	-0.00710493	0.775382		0.110484
OR2T5	0.909181	1.09147e-05		4.96199
MOCS1	-0.251482	0.160234		0.795246
MZB1	-0.285036	0.195707		0.708394
COIL	0.57101	0.0100648		1.99719
DGKZ	0.0305172	0.994524		0.00238468
EIF2AK2	-0.374533	0.0495091		1.30531
GEMIN2	0.541053	0.00494516		2.30582
MTRFR	0.42046	0.0552133		1.25796
CYP2A6	-0.00967044	0.845716		0.0727756
NLGN4X	0.0180323	0.584519		0.233201
THAP11	0.312188	0.100657		0.997156
QKI	0.10464	0.552841		0.2574
TFIP11	-0.130532	0.431592		0.364927
KRTAP9-4	0.475413	0.174483		0.758248
THAP4	-0.135416	0.259909		0.585178
ATP2C1	-0.0106887	0.91082		0.0405676
SMAD3	0.231899	0.24619		0.608729
FNDC3A	-0.382246	0.0154816		1.81018
PIP4K2B	0.271228	0.378846		0.421537
BID	0.128414	0.311386		0.5067
MKNK1	0.197742	0.318351		0.497093
CHMP3	-0.139091	0.389335		0.409677
SVIP	0.0530781	0.855234		0.067915
ZNF845	0.871772	0.00022309		3.65152
PCBP4	-0.146223	0.285327		0.544658
CCDC66	0.249851	0.0745876		1.12733
PSME1	0.119948	0.398405		0.399675
SDR39U1	0.00792609	0.863916		0.0635284
BCL2L14	0.641058	0.0013297		2.87625
TCEANC2	0.330617	0.194475		0.711135
FCGR2C	0.262112	0.354621		0.450235
DAPK3	-0.133175	0.615571		0.210722
E2F4	0.0475568	0.901984		0.0448011
LDHC	-0.136453	0.851749		0.0696881
TMEM250	0.123255	0.649046		0.187725
IRF9	-0.195307	0.196714		0.706164
KRTAP10-1	0.79461	0.00618658		2.20855
ABCA3	0.30233	0.922304		0.035126
COPS5	-0.390166	0.0270424		1.56796
COL6A2	-2.10511	4.93188e-06		5.30699
METTL17	0.166395	0.458817		0.338361
PIKFYVE	-0.238286	0.11144		0.952957
CENPT	-0.237906	0.263549		0.579138
PTGER4	-0.19569	0.411838		0.385273
FDCSP	0.866866	0.0187006		1.72814
ADCY2	-0.327138	0.122096		0.913298
SAAL1	-0.145162	0.306047		0.514212
VAMP5	0.135472	0.43496		0.36155
NRDC	-0.259154	0.0602123		1.22031
RRP36	0.00590665	0.878893		0.0560638
ANKRD13D	0.106017	0.511597		0.291072
PRKDC	-0.188918	0.140915		0.851044
MXD4	-0.159048	0.505051		0.296665
GMPR	-0.0126874	0.721921		0.14151
MAP4K5	-0.143264	0.449845		0.346937
CNNM4	0.0860882	0.837141		0.0772016
C1QTNF9B	1.04078	3.27194e-05		4.48519
HLA-B	0.241522	0.460008		0.337234
ZFP36L2	-0.380292	0.312754		0.504797
EIF5	-0.0175138	0.818344		0.0870639
AMPD2	-0.147915	0.556346		0.254655
MYO10	0.186664	0.433263		0.363248
TFF3	0.0293476	0.635473		0.196903
TMEM11	0.0476643	0.948154		0.0231213
VAPA	-0.0340248	0.947864		0.0232541
PPP3R1	-0.129586	0.590091		0.229081
ZNF304	0.0645782	0.605743		0.217711
GSK3A	-0.288176	0.13196		0.879557
SF3A1	0.00511164	0.593683		0.226446
GPR183	-0.0922479	0.747987		0.126106
HEBP1	-0.231868	0.117308		0.930674
CDK17	-0.0998335	0.977668		0.00980861
EIF3D	-0.205276	0.202766		0.693004
CHADL	0.54392	0.149431		0.82556
CBX4	-0.308803	0.239631		0.620456
TAPT1	0.191428	0.355725		0.448886
ZNF764	0.484307	0.0365375		1.43726
TBC1D25	0.269923	0.857456		0.066788
MFSD6	0.338089	0.17179		0.765002
C10orf71	0.349572	0.525993		0.27902
SMAD4	-0.121711	0.329543		0.482088
DELE1	0.586884	0.00344869		2.46235
CLINT1	-0.281967	0.0947096		1.02361
DNAJC3	-0.254916	0.202876		0.69277
ZNF765	0.303507	0.0707965		1.14999
TECPR2	0.024966	0.983923		0.00703901
RPRD1B	-0.176768	0.440798		0.355761
TRA2A	-0.464383	0.0104962		1.97897
TOMM20	-0.400992	0.05497		1.25987
METTL18	0.450872	0.0153202		1.81474
ZNF138	0.356939	0.0587132		1.23126
SELENOT	-0.242324	0.0874829		1.05808
OSGEPL1	0.222354	0.218733		0.660085
PSD4	0.0674721	0.790328		0.102193
ARHGAP17	0.226007	0.46613		0.331493
CDKN2C	-0.310426	0.183461		0.736457
NDUFB1	-0.2558	0.132691		0.877158
NAB1	-0.202987	0.345977		0.460953
MPPE1	0.14261	0.157702		0.802163
CHST15	-0.0579561	0.409715		0.387518
LAGE3	-0.0710848	0.488765		0.3109
CNOT1	-0.137761	0.347192		0.459431
EFCAB10	0.256694	0.442222		0.354359
AACS	0.148637	0.460652		0.336627
GPR152	0.244175	0.820204		0.0860779
RND3	0.303829	0.121566		0.915189
C8orf89	0.310456	0.346019		0.4609
KRT8	0.267555	0.803621		0.0949489
OTOL1	0.626587	0.07111		1.14807
IGFBP7	-1.92282	6.69741e-05		4.17409
HECW2	0.816006	0.000246928		3.60743
AQP1	-0.529394	0.0301832		1.52023
H2AX	0.0545929	0.671112		0.173205
MOB3A	-0.0738281	0.693898		0.158704
MAN1A2	-0.494151	0.0345994		1.46093
VPS13D	-0.219859	0.143946		0.841801
CARD10	0.0438304	0.899502		0.0459978
TNS3	0.503406	0.0454073		1.34287
AP3S2	0.214325	0.219259		0.659043
SEMA3G	0.498239	0.00583464		2.23399
PDLIM7	-1.73238	3.32737e-06		5.4779
SPCS2	-0.0692166	0.534488		0.272062
FA2H	0.363236	0.0518145		1.28555
KATNIP	-0.046053	0.733059		0.134861
APP	-0.534121	0.0280032		1.55279
HLA-A	-0.505711	0.00512064		2.29068
TXNDC8	0.00104305	0.962689		0.0165138
FGL2	-0.246294	0.275412		0.560018
PISD	-0.0722864	0.834091		0.0787865
CALM2	-0.781358	0.000429886		3.36665
JADE1	-0.478838	0.000143444		3.84332
FMO2	0.314055	0.294217		0.531333
MUL1	0.105346	0.281954		0.549822
GNA11	-0.588886	0.00408779		2.38851
PHF8	-0.198132	0.358795		0.445154
TAF1C	0.285139	0.409536		0.387708
PSRC1	0.0745754	0.716543		0.144758
CHAMP1	-0.0361306	0.771268		0.112795
BEGAIN	0.639956	0.00256826		2.59036
GDAP1L1	0.0394283	0.958354		0.0184739
CADPS2	0.14591	0.918683		0.0368342
VPS4A	-0.266847	0.0723729		1.14042
AGAP1	-0.385099	0.0368133		1.434
RBX1	-0.132518	0.265535		0.575878
PLEKHH2	0.346406	0.187927		0.726011
BAG2	-0.428757	0.00454713		2.34226
SSR4	-0.839808	0.0264235		1.57801
FBXW10	0.534427	0.00436911		2.35961
RRAGA	-0.225899	0.111275		0.953602
HSBP1	-0.174097	0.468399		0.329384
POU3F4	0.349503	0.0939008		1.02733
ZNF362	-0.184534	0.368719		0.433305
MRM2	0.44752	0.05825		1.2347
TFCP2L1	0.417234	0.638547		0.194807
LGALS3BP	-0.612437	0.000803479		3.09503
CYRIB	-0.0666341	0.770338		0.113319
ODF3L1	-0.0156599	0.74684		0.126772
FAIM	-0.106104	0.563984		0.248733
VAMP8	0.345859	0.103787		0.983859
BOC	-0.978133	0.000687704		3.1626
MLXIP	-0.456976	0.022019		1.6572
ABHD16A	-0.862684	0.00448487		2.34825
RNF38	0.427803	0.199399		0.700278
H2BC10	0.112543	0.675763		0.170206
MYL12B	-0.138901	0.258436		0.587647
PRXL2B	-0.45213	0.00274035		2.56219
LY86	0.373453	0.0940411		1.02668
PNO1	0.26951	0.388662		0.410428
ZNF106	-0.423392	0.0279955		1.55291
COX10	0.651955	0.184491		0.734025
ZNF394	0.191699	0.370429		0.431295
PIK3R1	-0.639826	0.0115677		1.93675
CCDC13	-0.952378	0.000522826		3.28164
HRAS	0.0589211	0.980484		0.00855964
PPP4R2	0.543457	0.000627704		3.20224
POFUT2	-0.0518353	0.928755		0.0320987
ETFA	0.0596945	0.720637		0.142283
YJEFN3	-0.0677413	0.665554		0.176817
SCD5	0.469127	0.114643		0.940652
FHOD1	-0.0292747	0.751539		0.124049
TRIM65	-0.0237549	0.668051		0.17519
NIPAL2	0.147477	0.417403		0.379444
ZNF146	0.10642	0.719429		0.143012
ZC3H18	-0.0593578	0.655237		0.183602
EIF2A	-0.104896	0.74783		0.126197
SMIM17	-0.737443	0.000231109		3.63618
POLR3H	0.232416	0.417845		0.378984
PEF1	-0.0371037	0.845668		0.0728
CD52	0.311558	0.160137		0.795508
MRPL12	0.105581	0.792798		0.100838
TMEM87A	0.0449206	0.949614		0.0224531
SLC35B3	0.0220698	0.915213		0.0384779
AGO2	-0.371994	0.00645533		2.19008
PBXIP1	-0.827997	6.23225e-05		4.20536
SLC37A1	0.272113	0.150217		0.823282
THUMPD1	0.481593	0.0110176		1.95791
LARS1	-0.225612	0.15181		0.818701
CUEDC1	0.0593799	0.603749		0.219144
IDH3B	-0.116919	0.536935		0.270078
NFE2L2	-0.425791	0.051557		1.28771
IFIT5	0.110978	0.698147		0.156053
SPRYD3	0.249951	0.464499		0.333015
HTR6	0.543961	0.0881713		1.05467
NIPSNAP2	-0.191227	0.176094		0.754255
CHRNA6	0.171026	0.427511		0.369053
PENK	-0.273236	0.255539		0.592543
CATSPERD	0.462448	0.0297306		1.5268
CDK2AP1	-0.375093	0.43058		0.365947
GLRX3	-0.0608342	0.748973		0.125534
BRD7	0.447433	0.0771318		1.11277
OR8D1	0.259134	0.267938		0.571966
TP53RK	0.419973	0.268205		0.571532
NDUFS3	-0.119992	0.370804		0.430856
EML5	0.337969	0.476708		0.321748
RIPK1	-0.0459818	0.799787		0.0970257
XPR1	0.0736852	0.876422		0.0572867
MOK	0.0183504	0.887398		0.0518817
TRAPPC9	0.242191	0.300675		0.521902
ADH5	-0.535935	0.00444641		2.35199
DHPS	-0.0793859	0.373282		0.427963
BTNL9	1.06739	0.00538274		2.269
IGFBP2	-0.6963	0.00270364		2.56805
PLSCR3	-0.491745	0.0074176		2.12974
ADGRE2	0.164755	0.550426		0.259301
SYNC	-0.418176	0.0191733		1.7173
COPB2	-0.357341	0.0349866		1.4561
PPP1R3F	0.460258	0.06859		1.16374
AJAP1	0.441738	0.160222		0.795279
TMBIM1	-0.407143	0.000951707		3.0215
CXXC1	0.258851	0.0548678		1.26068
ABHD17B	0.0536406	0.987209		0.00559111
MIB1	-0.291337	0.0797109		1.09848
TNFSF10	1.44937	2.30116e-05		4.63805
RAB23	-0.185044	0.546755		0.262207
MAP2K3	0.0508352	0.93416		0.0295785
FKBP2	-0.453291	0.00928861		2.03205
SAA2	0.269829	0.0727671		1.13806
OR7E24	0.666338	0.000281393		3.55069
ELAC2	-0.266161	0.227164		0.64366
WIF1	0.0225438	0.433041		0.363471
FLT1	0.343369	0.161814		0.790983
ATPSCKMT	0.128331	0.873066		0.0589527
TAS2R20	0.237464	0.216425		0.664693
ZNF197	0.142027	0.317811		0.49783
FAM161A	0.0498988	0.693878		0.158717
NIPBL	-0.0147962	0.914944		0.0386057
USP14	-0.034629	0.758844		0.119847
HNRNPH3	-0.557712	0.00225989		2.64591
SLC7A2	-0.0911902	0.601757		0.220579
KRTAP10-7	0.714589	0.0068845		2.16213
NPFFR1	0.5044	0.00506623		2.29531
ABCC1	-0.0680635	0.6138		0.211973
SHISA5	-0.134007	0.5714		0.24306
CPEB2	-0.0232912	0.533672		0.272726
GABRR1	0.20553	0.174489		0.758231
LYL1	0.203197	0.233918		0.630937
SLC35A3	0.410145	0.0230139		1.63801
MAMSTR	0.140749	0.829565		0.0811495
LUC7L3	-0.686891	0.00415855		2.38106
FGR	0.0414005	0.764926		0.11638
SCAMP3	-0.231163	0.473505		0.324675
INPP5A	-0.449208	0.0267124		1.57329
STRN4	-0.251621	0.148916		0.82706
RAB11A	-0.0455145	0.734817		0.133821
CDH1	0.0970292	0.963792		0.0160165
TRIM43	0.722321	3.26879e-05		4.48561
PHKG1	0.578848	0.0278604		1.55501
BRD2	0.0592088	0.584657		0.233099
THOC3	0.154861	0.599629		0.222118
SLC38A11	-0.144542	0.267263		0.573061
TNFRSF14	0.00428494	0.996946		0.00132839
MEF2D	-0.323061	0.0582609		1.23462
PRAMEF10	0.270548	0.269182		0.569954
ELAVL1	0.0311758	0.587917		0.230684
SORCS3	0.632871	0.0416544		1.38034
WBP2	0.235142	0.233642		0.631449
RCOR1	-0.0278119	0.894368		0.0484837
HNRNPA0	-0.262966	0.170539		0.768176
NOVA2	0.00950218	0.759553		0.119442
SHISA8	0.414344	0.0437229		1.35929
RPS10	-0.0212433	0.728609		0.137506
TCN1	0.639632	0.00773765		2.11139
RTN4	-0.717882	2.56045e-05		4.59168
HSF2	0.142624	0.314457		0.502438
MBD3	0.0561621	0.917745		0.0372782
IL31RA	0.214902	0.536327		0.270571
CES4A	0.0210147	0.732784		0.135024
UBTD2	-0.17682	0.313613		0.503606
CDKN1A	0.0930782	0.217602		0.662337
NBPF11	0.52118	0.0251931		1.59872
RB1CC1	-0.187423	0.250304		0.601532
CDCA3	0.0815803	0.836514		0.0775267
HPSE2	-1.17196	0.000611877		3.21334
ZNF697	0.676045	0.0203287		1.69189
CSF1	0.46465	0.0380766		1.41934
ICE1	0.339863	0.255188		0.593141
FBXL2	0.181374	0.416243		0.380653
NUDC	0.323673	0.0220353		1.65688
DRD5	0.652913	0.00398633		2.39943
RBM5	-0.155188	0.451879		0.344978
ALDOB	0.435719	0.0965004		1.01547
RAPGEF4	0.526318	0.000709309		3.14916
STEAP4	-0.201355	0.387354		0.411892
RPP14	-0.055776	0.506453		0.295461
HSPE1	0.221113	0.203129		0.692229
KIF21A	0.0474253	0.814432		0.0891451
FAM174B	0.224951	0.142635		0.845774
GDF5	0.0362393	0.885551		0.0527866
TATDN1	0.12362	0.3866		0.412738
MAP3K10	0.0418052	0.848381		0.0714092
SLC30A7	0.228898	0.336891		0.472511
RPS15	-0.422819	0.0415724		1.38119
OR52K2	0.173032	0.863815		0.0635792
PPP1R2C	-0.136893	0.741332		0.129987
FANCD2OS	0.322333	0.064881		1.18788
SH3KBP1	-0.283698	0.0821658		1.08531
TPRN	0.285234	0.0766427		1.11553
SDR9C7	0.581599	0.017732		1.75124
HLA-F	0.346398	0.120117		0.920396
PSG9	0.297977	0.272291		0.564966
ANAPC11	-0.045515	0.689448		0.161498
ASB10	0.54863	0.00195358		2.70917
SYVN1	-0.353786	0.0616355		1.21017
PINLYP	-0.252697	0.106826		0.971322
SIDT1	1.16835	0.000137108		3.86294
TMEM125	0.662355	0.0174421		1.7584
AKAP1	-0.579461	0.00229806		2.63864
RPS19BP1	-0.136276	0.255418		0.592749
LCN2	-0.335226	0.168775		0.772691
EEF1AKMT2	-0.135708	0.315488		0.501018
IRF3	-0.12156	0.963325		0.0162272
PPP2R5A	0.0167659	0.747952		0.126126
CEP55	0.0231308	0.923646		0.0344943
ZNF214	0.1611	0.526019		0.278999
MAPK6	0.548858	0.010069		1.99701
LIMS3	0.291484	0.224037		0.64968
AAMP	-0.105246	0.383665		0.416048
KIAA1328	0.466967	0.0222948		1.6518
MYCBP2	-0.321033	0.0425315		1.37129
THSD7A	-0.046269	0.918491		0.036925
UGGT1	-0.20695	0.329225		0.482508
MRPL34	-0.0937513	0.327121		0.485291
BLVRA	-0.210786	0.128947		0.889587
PPP6R3	-0.449547	0.0049933		2.30161
DENND4C	-0.261774	0.105436		0.97701
CTNND2	0.161747	0.336093		0.47354
ULBP1	0.862193	0.000702394		3.15342
ARID2	-0.203379	0.239098		0.621425
APBB1	-0.182333	0.540108		0.267519
SNX1	-0.134767	0.562144		0.250153
KRT5	-0.916043	0.0910365		1.04078
KLHDC4	-0.221359	0.23225		0.634044
RPL18	-0.749258	0.000730596		3.13632
RENBP	-0.0853671	0.411533		0.385595
TMPRSS7	0.780166	0.0342019		1.46595
ACER2	-0.1277	0.56583		0.247314
NR2C2AP	0.244969	0.282479		0.549014
SNRNP27	0.11974	0.984614		0.0067342
RNF181	-0.496986	0.0026556		2.57584
AEBP1	-1.24464	0.0027096		2.56709
IPO5	-0.224891	0.161178		0.792695
CLEC18A	0.45798	0.00554445		2.25614
PEAK1	-0.246395	0.0987681		1.00538
DHX15	-0.184817	0.145425		0.837362
CAVIN2	0.133645	0.595828		0.224879
ALDOC	0.293124	0.357447		0.446788
ZADH2	-0.0287669	0.951347		0.0216609
ATP1A1	-0.573761	0.0192713		1.71509
TXLNA	-0.500545	0.00766042		2.11575
SPDYE11	0.968212	2.40912e-05		4.61814
TSPAN11	-0.00804515	0.896499		0.0474502
YPEL3	-0.064669	0.455305		0.341698
COG2	0.0196093	0.967605		0.0143019
RPP25	0.352626	0.145994		0.835666
NKTR	-0.0689799	0.384543		0.415056
HSD17B11	0.384601	0.00911139		2.04042
GYS1	-0.403591	0.0191914		1.71689
RALGDS	0.400534	0.0694208		1.15851
PTPN12	-0.0573311	0.804137		0.0946701
OR5H1	0.462954	0.00463431		2.33402
UBA3	-0.182405	0.495056		0.305346
ZC3H7A	-0.119774	0.423618		0.373026
CCR7	0.212017	0.46074		0.336544
POLR2I	-0.322874	0.0164005		1.78514
FAM156A	-0.0846852	0.500244		0.300818
NPY1R	0.0186998	0.689422		0.161515
MYO1G	0.206687	0.143325		0.843679
CLK2	0.300644	0.324842		0.488328
SENP1	0.309408	0.140468		0.852423
PAM	-0.491305	0.0188564		1.72454
DDX25	0.27081	0.0720643		1.14228
CCDC144A	0.623152	0.00184454		2.73411
CYB5D2	-0.0240146	0.929607		0.0317008
NR1D2	0.152713	0.299841		0.523108
AMDHD1	0.461696	0.0597688		1.22353
NOTCH2	-0.547807	0.00320593		2.49405
IKZF1	-0.415718	0.0717577		1.14413
YY1AP1	-0.388293	0.00843768		2.07378
ZSWIM3	0.167897	0.409462		0.387786
FTH1	-0.486483	0.0210183		1.6774
APH1B	0.413515	0.0350275		1.45559
KIDINS220	-0.355728	0.0270063		1.56854
SLC22A13	0.626119	0.0615676		1.21065
EZH1	-0.127329	0.290336		0.5371
LZTS3	-0.265752	0.160413		0.79476
PTCRA	-0.051506	0.570902		0.243439
RFX2	-0.0813724	0.479005		0.31966
ARFGEF1	-0.513701	0.000626845		3.20284
COL8A1	-0.424459	0.0629815		1.20079
POLR2L	-0.218644	0.152283		0.817349
MIGA2	-0.309588	0.0729129		1.1372
TMEM123	-0.302146	0.150383		0.822802
IL2RG	0.178028	0.444252		0.35237
TEPP	0.401471	0.320193		0.494588
RASSF8	-0.408461	0.0209423		1.67897
SLC25A23	-0.432728	0.0385778		1.41366
GABARAP	-0.420298	0.0230631		1.63708
FOXO4	-0.241789	0.109612		0.96014
ART1	0.191048	0.420959		0.37576
MOB3C	0.201549	0.319855		0.495046
ACAA2	-0.00255317	0.996109		0.00169309
IFT20	-0.202116	0.166837		0.777708
RNF144A	0.442416	0.00602755		2.21986
ZFPL1	0.129027	0.799698		0.0970739
TBRG4	0.254563	0.306347		0.513786
NPB	0.182625	0.293095		0.532991
GGTA1	0.111261	0.458686		0.338484
RAD23A	-0.237853	0.10763		0.968066
SNRK	0.0630725	0.90354		0.0440525
CREB3	-0.483463	0.00474699		2.32358
KDM2A	-0.483815	0.029061		1.53669
TUBB1	0.573554	0.00291137		2.5359
METTL25	0.548877	0.129794		0.886744
CAPZB	-0.787886	3.41108e-05		4.46711
PIGA	0.277048	0.185853		0.730831
CYP1B1	-0.655074	0.020042		1.69806
SH3BP2	0.155992	0.383229		0.416542
CSTF3	-0.330015	0.087154		1.05971
GPR141	-0.0425149	0.633127		0.198509
ZNF385A	-0.159401	0.226194		0.645518
MT1X	-2.28159	6.51999e-05		4.18575
RNF139	0.141647	0.357647		0.446545
ZNF549	0.3849	0.0321893		1.49229
ARHGAP1	-0.872112	0.00106188		2.97392
RAB3D	0.0316822	0.905798		0.0429687
C1orf43	-0.459809	0.0117189		1.93111
RAP1GAP	-0.655308	0.0739137		1.13128
SNAP23	-0.185655	0.171106		0.766735
PHC2	-0.627521	0.00745384		2.12762
SRGAP1	-0.192039	0.329978		0.481514
FARSA	0.0618887	0.750715		0.124525
BICRA	0.587194	0.091293		1.03956
LARP7	0.0603069	0.916204		0.038008
ING2	0.333535	0.0717714		1.14405
TCEAL4	-1.37927	8.20413e-05		4.08597
LDAH	0.222207	0.191442		0.717963
GSK3B	-0.0216442	0.885317		0.052901
SCGB3A1	0.100503	0.392942		0.405672
SLC17A3	0.402917	0.170112		0.769264
STAT3	-0.473638	0.0540083		1.26754
ARC	0.798159	0.00580385		2.23628
TUBGCP2	-0.189898	0.183725		0.735832
PRDX1	-0.397834	0.00840073		2.07568
KRTAP10-9	0.72544	0.00996368		2.00158
CEP250	-0.0523112	0.985003		0.00656248
SUMF1	-0.0672792	0.547107		0.261928
ESPN	0.509618	0.0248026		1.6055
NATD1	-0.149382	0.462591		0.334803
JPT2	0.00962975	0.941617		0.0261259
KANK1	-0.624341	0.0105664		1.97607
SMARCE1	-0.169438	0.235904		0.627265
NT5C3A	0.260463	0.171945		0.76461
PCBD1	-0.216127	0.236536		0.626102
CARD19	0.042799	0.735475		0.133432
IFI44	0.0495726	0.926406		0.0331987
SF3A2	-0.127692	0.745311		0.127662
EXTL3	-0.607256	0.0027658		2.55818
UBE2Q2	0.284262	0.562205		0.250105
RAB14	-0.0118123	0.890109		0.0505567
H2BC17	0.280264	0.117683		0.929287
MND1	0.677992	0.0177207		1.75152
SMG1	-0.605385	0.00265165		2.57648
MPP7	-0.00605116	0.891875		0.0496962
JPH2	-1.41675	0.000112501		3.94884
NKD2	-0.867501	0.00185038		2.73274
ALOX5	-0.0711644	0.511575		0.291091
DNAJC17	0.146079	0.626875		0.202819
MC4R	0.231039	0.296379		0.528153
ZNHIT3	-0.157333	0.602655		0.219931
TAPBP	0.0996796	0.656388		0.182839
SFT2D1	-0.0298804	0.550093		0.259564
MSRB3	-0.416097	0.0131448		1.88125
MRPL21	0.412213	0.039797		1.40015
LAMTOR4	-0.0191648	0.613902		0.211901
DAPK1	0.0747003	0.681801		0.166342
ELMO3	0.184369	0.382658		0.417189
ACOT9	-0.467088	0.120325		0.919645
DCAF1	-0.160953	0.213394		0.670818
DBF4B	-0.00947823	0.584977		0.232861
RPL7L1	0.126275	0.251266		0.599867
LIMD2	0.0754787	0.707758		0.150115
PLXND1	0.105274	0.654251		0.184255
PITPNM3	-0.185176	0.515617		0.287673
H3C7	0.186548	0.992191		0.00340492
HSPA9	-0.303038	0.0234483		1.62989
PRKACB	0.0657493	0.799767		0.0970365
THOC6	0.00604465	0.905658		0.0430358
FAT4	-0.202472	0.173557		0.760558
SMCHD1	-0.76706	0.000947501		3.02342
ATG4B	-0.296949	0.0777772		1.10915
AFG3L2	0.238341	0.194592		0.710875
TMEM176A	-0.468345	0.0268313		1.57136
RPS6KA2	-0.0959168	0.365318		0.437329
NYAP2	0.00969276	0.861795		0.0645959
CSRP2	-0.136045	0.343235		0.464409
PFDN4	-0.0691808	0.701576		0.153926
EIF4E	0.242408	0.146993		0.832704
HMGXB4	0.401899	0.209304		0.679222
ZKSCAN5	0.462836	0.0322248		1.49181
TMEM161B	-0.112328	0.612339		0.213008
ZMYM4	-0.140507	0.465588		0.331998
NBPF14	0.20268	0.174975		0.757024
GRN	-0.262838	0.201361		0.696026
TTC37	-0.1999	0.180238		0.744153
CA2	0.299203	0.364106		0.438773
HSP90B1	-0.40553	0.0242519		1.61525
SF3B6	-0.130289	0.463182		0.334249
BMP3	0.285895	0.161144		0.792785
TBX2	-0.183378	0.127746		0.893651
SLMAP	-0.819266	0.000239774		3.6202
PEX16	0.0740703	0.683575		0.165214
BBS1	0.0708041	0.564282		0.248504
CCDC88B	-0.0351358	0.614238		0.211664
LY6G6F	0.728194	0.000434352		3.36216
ILRUN	0.0589875	0.682966		0.165601
GOLGA7B	0.601072	0.0106139		1.97413
IVNS1ABP	-0.00681765	0.8747		0.0581408
ITGA5	-1.54992	0.00535241		2.27145
SLC35B4	0.0145395	0.928661		0.0321429
HDDC2	0.512065	0.0449923		1.34686
HIPK1	0.0515402	0.790421		0.102142
LRRC61	0.264406	0.118777		0.925267
PI15	0.286619	0.33833		0.470659
PRSS38	0.392222	0.0246617		1.60798
SLC35G6	0.340027	0.0366199		1.43628
AK1	0.340763	0.086864		1.06116
PDCL	0.475221	0.061885		1.20841
ZYX	-0.517399	0.0180077		1.74454
GART	0.0203486	0.835693		0.0779531
RSPO4	-0.104169	0.409517		0.387728
TLR2	-0.10474	0.422857		0.373807
SLAIN2	-0.177182	0.32333		0.490354
IMPA1	0.123827	0.500939		0.300215
GK5	-0.232374	0.222391		0.652882
IRF8	0.0753512	0.94683		0.0237281
SOX13	0.0587698	0.528554		0.276911
PLAGL2	0.422641	0.0324826		1.48835
KRT18	0.892387	0.0862216		1.06438
ZNRF1	0.179016	0.0817665		1.08742
NKX2-1	0.102215	0.841825		0.074778
CDC26	0.123082	0.431046		0.365476
PDCD6IP	-0.104822	0.403111		0.394575
KCNJ16	-0.0221988	0.596151		0.224643
RASA1	0.105614	0.474729		0.323555
MAP2K7	0.157556	0.272221		0.565079
FKRP	0.3489	0.106455		0.972835
POLDIP3	-0.174376	0.472187		0.325886
RGS3	-0.263657	0.0535773		1.27102
DAZAP1	-0.433697	0.00398963		2.39907
IQGAP1	-0.670285	0.000746315		3.12708
EYA4	0.421768	0.143899		0.841941
VRK2	0.164188	0.443389		0.353215
HDAC4	-0.119392	0.56781		0.245797
RBBP4	-0.0546809	0.848507		0.0713446
PALLD	-1.64135	1.38505e-05		4.85854
SENP3	-0.172006	0.320729		0.493862
SCEL	0.326843	0.347261		0.459344
WDR6	-0.241097	0.129276		0.888482
LGALS3	-0.213134	0.224944		0.647926
RAB7B	0.339632	0.0317874		1.49775
GPATCH2L	-0.0753105	0.816108		0.0882523
NFKBIZ	0.769355	0.0168141		1.77433
RPL36	-0.932189	2.13106e-05		4.6714
CCT2	0.0872211	0.546652		0.262289
TBCB	0.0287918	0.876736		0.0571311
TCEAL3	-0.113623	0.610114		0.214589
ATP6V1B1	0.176222	0.432114		0.364402
BRCC3	0.46959	0.0308253		1.51109
GABPB1	0.230149	0.589462		0.229544
DKK1	-0.0784909	0.542836		0.265332
CNNM1	0.344301	0.0901453		1.04506
IER3IP1	-0.294329	0.132219		0.878705
CBLC	0.51723	0.0443163		1.35344
CIZ1	-0.463041	0.045605		1.34099
PRR29	0.0336996	0.957171		0.0190105
SMC1A	-0.164981	0.461085		0.336219
FOXC1	0.299322	0.47723		0.321272
ZNF574	0.126542	0.282185		0.549467
RASD1	-0.0656463	0.605577		0.217831
ALG12	-0.255731	0.17141		0.765964
CASP8AP2	0.257821	0.193699		0.712873
ITPR1	-0.641592	0.0368722		1.4333
RPS27A	-0.657774	0.00389555		2.40943
AXIN2	-0.427578	0.0630825		1.20009
SEC24B	0.0066192	0.707395		0.150338
KDM5C	-0.458753	0.148516		0.828226
RPS9	-0.652621	0.00122439		2.91208
TMEM213	-0.231176	0.107457		0.968763
MOXD1	-0.442123	0.0956042		1.01952
ACAD10	-0.0295322	0.798523		0.0977128
OR4S2	0.176449	0.35652		0.447916
POLR3A	0.047022	0.900996		0.0452774
TINF2	0.0234176	0.877324		0.0568398
DNAJB14	0.0280247	0.81421		0.0892636
APOA5	0.107461	0.961842		0.0168962
GNL3L	-0.114388	0.533254		0.273066
FAM43B	0.363553	0.114315		0.941898
SETD1B	0.028227	0.871679		0.0596434
PITPNB	-0.195493	0.957462		0.0188782
C9orf131	0.282371	0.122195		0.912948
TMEM150A	0.0326189	0.764722		0.116497
TWF1	-0.0506499	0.707213		0.15045
CAD	0.0214687	0.867303		0.0618292
BASP1	-0.340526	0.0181452		1.74124
KIAA2013	-0.314664	0.0106817		1.97136
CYLD	0.21341	0.424302		0.372325
CCDC183	0.513659	0.081392		1.08942
NDE1	0.0220538	0.830807		0.0805001
SS18	0.0438356	0.769912		0.113559
GIMAP7	0.280168	0.165917		0.780109
ZNF580	-0.348819	0.0265314		1.57624
KHDRBS1	-0.177306	0.212457		0.672729
CXADR	0.965143	2.35284e-05		4.62841
PLXNA1	0.248477	0.396958		0.401255
MAD2L2	0.0211707	0.480165		0.318609
RPS6	-0.750819	0.00264034		2.57834
GET1	0.266676	0.136008		0.866437
MAFG	-0.321117	0.221744		0.654149
EDC3	-0.126782	0.25483		0.593749
CDX4	0.631043	0.0267569		1.57256
TIMMDC1	-0.376104	0.114672		0.940543
ABHD12	0.05101	0.727723		0.138034
RPL5	-0.599861	0.00156923		2.80431
BST2	0.415123	0.0389159		1.40987
DZIP1	0.439419	0.120693		0.918319
NT5C	-0.0279005	0.961529		0.0170377
GORASP2	-0.160464	0.159214		0.79802
EMP1	0.559875	0.0676215		1.16992
ASB2	-0.465879	0.073771		1.13211
SLC4A2	-0.491928	0.0462599		1.3348
ZNF705B	0.923533	3.88316e-05		4.41081
AAK1	-0.159566	0.22559		0.64668
THYN1	-0.318779	0.147299		0.831801
ENHO	0.638329	0.0422026		1.37466
SPON1	-1.08831	3.1023e-05		4.50832
MET	-0.474088	0.00552735		2.25748
NKX6-1	0.760632	0.0113269		1.94589
CISD2	0.611099	0.0284675		1.54565
SLC25A37	0.0565853	0.92548		0.0336328
EBLN2	0.203828	0.885827		0.0526511
PLPP1	-0.784721	0.00221287		2.65504
NECTIN3	0.226356	0.545311		0.263356
MX1	0.541088	0.0111318		1.95344
C6	-0.107585	0.842651		0.0743523
OSBPL9	-0.61949	0.0016134		2.79226
LTO1	-0.299524	0.0593398		1.22665
TBL1XR1	-0.230396	0.195439		0.708989
CCL8	0.549772	0.000990029		3.00435
MT1M	-0.655166	0.0829099		1.08139
RANBP3	-0.0252516	0.581576		0.235393
SEL1L	-0.318713	0.038651		1.41284
CHP1	-0.00135795	0.933864		0.0297164
RNF183	0.342382	0.031807		1.49748
APOA1	0.300986	0.0831632		1.08007
RIN2	0.256038	0.0950976		1.02183
TSEN15	-0.169909	0.24937		0.603156
ACSL4	-0.364811	0.0300738		1.52181
KIAA1109	0.0716151	0.975257		0.010881
AKAP9	0.028757	0.821709		0.0852821
ALDH3B1	0.400181	0.152124		0.817803
HMG20B	-0.359525	0.156486		0.805525
TRIM36	-0.020748	0.992333		0.00334254
DNAAF8	0.628799	0.0177302		1.75129
NABP1	0.16693	0.285312		0.544681
ACTA2	-3.32608	4.72797e-05		4.32533
HMGA1	0.203695	0.765025		0.116324
PSPC1	0.264404	0.353545		0.451556
FBXO11	-0.0697574	0.575885		0.239664
MRPS10	0.388106	0.258852		0.586948
HEXA	-0.409829	0.0147647		1.83077
FAM3C	0.159553	0.461519		0.33581
TUBA3C	0.132334	0.409217		0.388047
TMSB10	-0.175795	0.323882		0.489614
RHEBL1	0.481152	0.021636		1.66482
LARGE1	-0.292384	0.147228		0.83201
COL4A1	-0.860761	0.00679438		2.16785
YTHDF1	0.443244	0.033395		1.47632
VPS9D1	0.139087	0.725603		0.139301
RSAD1	-0.0806751	0.467225		0.330474
TUBB8	0.668306	0.0298053		1.52571
STAT1	0.0611326	0.964683		0.0156155
DNTTIP2	0.278702	0.0542749		1.2654
ZNF679	0.124384	0.43037		0.366158
SGK1	-0.0480432	0.786259		0.104434
SLC6A6	-0.0751467	0.562628		0.249778
COPS8	-0.0931013	0.372892		0.428417
RAB13	-0.263648	0.0547083		1.26195
TMPRSS6	0.541192	0.035877		1.44518
ATF5	0.0603248	0.749768		0.125073
FAM185A	0.313821	0.0574545		1.24068
SLC22A18AS	0.622061	0.00103602		2.98463
TMEM205	0.204917	0.590267		0.228951
TRHDE	0.542264	0.0111644		1.95217
H2AC11	0.424995	0.0456982		1.3401
SNAPIN	-0.0261073	0.906052		0.0428469
SUZ12	0.224429	0.309012		0.510025
SLC17A6	0.359939	0.110077		0.958305
CSPG4	-0.57258	0.00804989		2.09421
COPS7A	-0.175013	0.268699		0.570735
GNL3	-0.236284	0.178723		0.747819
GPR107	0.0332966	0.751077		0.124316
HMGCR	0.421231	0.450865		0.345953
TMOD3	0.117267	0.508735		0.293508
ANAPC15	0.2077	0.285495		0.544402
INO80B	0.250286	0.186848		0.728511
RAI2	-0.308692	0.055055		1.2592
CD79B	0.929203	0.000301059		3.52135
PLPP3	-0.0275696	0.833245		0.0792275
MAPKBP1	-0.360808	0.0261581		1.58239
FGFR1	-0.639203	0.00728443		2.1376
NUP153	0.187839	0.478839		0.319811
POLD2	-0.254012	0.123878		0.907005
H4C13	-0.0555723	0.732656		0.1351
OSTF1	-0.0969959	0.641679		0.192682
PTPRC	-0.361937	0.0798405		1.09778
SLC17A8	0.133995	0.298967		0.524376
ACVRL1	0.370671	0.064299		1.1918
EPSTI1	0.21846	0.406841		0.390575
SPP1	0.674485	0.297144		0.527033
CASP10	0.331441	0.107047		0.970427
RPL9	-0.741968	0.000673766		3.17149
ATP13A3	0.0918378	0.57754		0.238418
GPX3	-0.152762	0.71015		0.14865
HBP1	0.0786226	0.504663		0.296999
FAM126A	-0.27746	0.330749		0.480501
SNRPG	0.0992038	0.8646		0.0631849
SOX4	0.191502	0.234217		0.630382
LHPP	-0.161222	0.402668		0.395053
ARL13B	0.209718	0.377411		0.423186
UNC50	-0.300998	0.0242645		1.61503
ARHGEF35	0.672181	0.00251069		2.60021
CCT7	0.071837	0.91739		0.0374459
TBPL1	0.440762	0.0489219		1.3105
RFPL4A	0.559727	0.0332112		1.47872
FAM107B	-0.0146803	0.865471		0.0627476
ALDH1A1	0.204974	0.621662		0.206446
RUSF1	-0.0972165	0.541642		0.266288
RPS6KA1	0.217062	0.93024		0.0314049
SFPQ	-0.252796	0.767162		0.115113
CD81	-0.60006	0.00928105		2.0324
WDR41	0.269036	0.351702		0.453825
SLC18A2	-0.197851	0.336374		0.473178
NCF4	0.0412065	0.964833		0.015548
UGT2A3	0.56533	0.0232931		1.63277
OR4F15	0.277737	0.224954		0.647906
GPRC5B	-0.105118	0.631012		0.199962
CCDC181	0.143802	0.436827		0.35969
ECHDC3	0.128193	0.371251		0.430332
CC2D1A	0.323243	0.135427		0.868296
PRKCZ	0.451723	0.0973703		1.01157
DENND5B	-0.0133954	0.938932		0.027366
TCF4	0.00514254	0.619057		0.208269
FOXN3	-0.563028	0.00370588		2.43111
ERH	0.00730214	0.877625		0.0566909
ARF1	-0.559913	0.00898219		2.04662
PSMB8	-0.174807	0.576872		0.23892
CBWD2	0.443515	0.00803549		2.09499
TMEM132C	0.290179	0.111426		0.953012
IZUMO1R	0.464398	0.0618585		1.2086
SLC39A1	-0.423478	0.0155279		1.80889
RAB39A	0.42555	0.0179077		1.74696
FAM13C	-0.460129	0.0212811		1.67201
PAPSS2	0.673284	0.064384		1.19122
SFTPB	0.550247	0.266634		0.574085
ARPC4	-0.397885	0.0193566		1.71317
FOXK2	0.0693836	0.795838		0.0991752
RAP1A	-0.339762	0.0582589		1.23464
RPS4X	-0.615275	0.00840761		2.07533
CSAG3	0.369301	0.2417		0.616723
PPRC1	0.450199	0.0307662		1.51193
ADCY7	0.175221	0.391582		0.407178
OR4A47	0.581916	0.00033081		3.48042
ARF4	-0.721525	0.000888667		3.05126
ADGRL3	0.0972714	0.437724		0.3588
EEF1G	-1.05119	0.00132713		2.87709
DCTN5	-0.0648105	0.480222		0.318558
SLC6A7	-0.0426759	0.959897		0.0177753
IL7R	-0.0968159	0.395216		0.403166
ZNF346	0.130494	0.194769		0.71048
AK2	-0.295401	0.0694169		1.15853
CCDC51	0.451478	0.0135408		1.86836
ELAPOR1	0.349174	0.198209		0.702877
CD27	-0.167355	0.344477		0.46284
FOXA2	0.374935	0.141237		0.850051
CDH23	-0.121235	0.665132		0.177092
SSR2	-0.0311058	0.697366		0.156539
DQX1	0.134773	0.399933		0.398013
IQCB1	-0.120296	0.478845		0.319805
C1QC	-0.15425	0.985776		0.00622185
DHRS7	-0.121469	0.412745		0.384319
LETM1	0.290275	0.145939		0.83583
C2orf80	0.336908	0.23349		0.631731
SRP68	-0.0724221	0.754		0.122629
SUFU	-0.116658	0.34553		0.461514
PRDX2	-0.387559	0.0121095		1.91687
SPI1	0.589448	0.0318564		1.4968
BCAR1	0.317014	0.0786083		1.10453
TRIP11	-0.065052	0.367317		0.434959
RAB11FIP1	0.610409	0.101627		0.992991
NEK2	0.186958	0.294336		0.531156
NLN	0.218043	0.273754		0.56264
PDE7A	0.105974	0.83923		0.0761192
PHTF1	-0.392085	0.266006		0.575108
EEPD1	-0.371721	0.0536045		1.2708
RINT1	0.102652	0.715518		0.145379
ZNF805	0.029489	0.7459		0.127319
NRP2	-0.864207	0.000862757		3.06411
FUCA1	0.125617	0.65667		0.182653
OGDH	-0.314918	0.249678		0.60262
MAP2K4	0.0961421	0.69323		0.159123
ARHGAP28	0.102522	0.985271		0.00644441
ANKRD20A1	0.687267	0.00060803		3.21607
UNG	0.435755	0.0557811		1.25351
CREBL2	-0.0359129	0.583997		0.233589
DNLZ	-0.653161	0.0294771		1.53052
ARHGAP29	-0.0254752	0.537713		0.269449
PPP2CA	-0.560812	0.00670451		2.17363
ZNF213	0.0905678	0.55734		0.25388
ZAR1L	0.262322	0.255313		0.592928
MICU3	-0.106883	0.269453		0.569518
DEFB131A	0.909455	9.16467e-06		5.03788
SERF2	-0.895115	0.000624435		3.20451
CDK13	-0.394465	0.113181		0.946226
ASH1L	-0.355023	0.108943		0.962802
MORF4L2	-0.798947	0.000441316		3.35525
FOXK1	0.250578	0.429541		0.366996
ZNF395	-0.0527508	0.681041		0.166826
SLC39A3	0.316676	0.266528		0.574257
MID1IP1	0.143941	0.482893		0.316149
HP1BP3	-0.114182	0.450744		0.34607
ERP29	-0.227918	0.0734019		1.13429
TSSC4	-0.0844033	0.480419		0.31838
GJD4	0.391526	0.113409		0.945351
TTC39B	0.0221815	0.893841		0.0487398
CTIF	0.0611669	0.913791		0.0391531
USP11	-0.0706447	0.538987		0.268422
SYNE1	-0.0934101	0.696458		0.157105
SOAT1	-0.802067	0.0015653		2.8054
NID2	0.00328325	0.959735		0.0178487
NFASC	-0.339557	0.0964066		1.01589
ANKRD33B	-0.0837131	0.581994		0.235082
OR2D2	0.208677	0.535085		0.271577
DGKH	0.275776	0.0567958		1.24568
OFD1	0.320295	0.0356413		1.44805
DMTF1	-0.469051	0.00977873		2.00972
MAN1C1	0.166409	0.623824		0.204938
GSTA1	0.369003	0.286981		0.542147
PRDM12	0.433609	0.0393906		1.40461
ANLN	0.420679	0.0296935		1.52734
MARCHF5	-0.0506518	0.461516		0.335813
ZFP90	0.068797	0.76603		0.115754
CLPTM1	-0.474877	0.00511112		2.29148
IKBKG	0.0275505	0.742437		0.12934
DPP8	-0.163334	0.177319		0.751244
IGFBPL1	0.151492	0.405973		0.391502
COL1A2	-2.13145	0.000927364		3.03275
NDRG1	-0.390224	0.0744699		1.12802
KIFC3	0.607951	0.0233758		1.63123
SIK2	-0.198215	0.431808		0.364709
SHTN1	-0.0627718	0.608185		0.215965
ASCL1	0.197768	0.924494		0.0340961
SLC16A5	0.503418	0.0488831		1.31084
LRFN5	0.192753	0.287431		0.541466
WLS	-0.635468	0.00128775		2.89017
COX6C	-0.842211	4.22369e-05		4.37431
CPD	-0.0336158	0.592197		0.227534
STK40	0.223673	0.201675		0.695347
VSIG4	0.131198	0.759576		0.119429
MTUS1	-0.462269	0.00367395		2.43487
FBLIM1	-0.977287	7.43542e-05		4.12869
TM2D1	-0.165631	0.459434		0.337777
EIF2B1	-0.328202	0.0650235		1.18693
TFPI2	0.292922	0.296564		0.527881
SUCO	-0.0522761	0.635327		0.197003
CCKAR	0.154634	0.563787		0.248885
NDUFS5	-0.594774	0.000829767		3.08104
VPS13C	-0.667879	0.00235893		2.62729
UQCC2	-0.254616	0.0455488		1.34152
SSNA1	0.0621331	0.590337		0.2289
DHFR	0.286681	0.0840972		1.07522
TFRC	0.183721	0.465453		0.332125
TSEN54	-0.100428	0.511598		0.291071
UBR3	-0.275096	0.0966966		1.01459
FCF1	1.58169	4.09856e-05		4.38737
MAP3K15	-0.138891	0.574166		0.240962
POSTN	-2.00906	0.00202322		2.69396
PTK2	-0.150563	0.315863		0.500501
PSMA2	-0.146528	0.377337		0.42327
DENND6A	0.161251	0.497831		0.302918
CNOT2	-0.119722	0.469655		0.328221
WDR82	0.324534	0.396409		0.401856
PCBP1	-0.331145	0.0666813		1.176
AQP4	0.484135	0.0786887		1.10409
BTNL8	0.033209	0.45007		0.34672
DDX20	0.455008	0.0192802		1.71489
MCEE	0.0954851	0.962278		0.0166995
TMX4	-0.0598182	0.80778		0.0927071
C7orf50	-0.234853	0.225451		0.646947
ZC3H4	-5.87188e-05	0.830547		0.080636
RRM2B	0.313002	0.257605		0.589045
DYNC2LI1	0.0303073	0.690757		0.160675
NSL1	0.0654232	0.480759		0.318073
LRP10	-0.294073	0.252609		0.597551
TMED10	-0.706493	0.000994092		3.00257
WWP1	-0.07466	0.55809		0.253296
ANKRD40	0.0982684	0.658914		0.181171
FAM216A	0.452535	0.0182758		1.73812
OR4Q3	0.637415	0.0148709		1.82766
SPPL2B	-0.207333	0.205627		0.68692
ERLIN2	0.0315044	0.678218		0.168631
GOLGA5	0.106637	0.669103		0.174507
EXOSC1	-0.29284	0.274696		0.561147
SIN3B	-0.236879	0.18862		0.724413
MAOB	-0.424793	0.0320865		1.49368
SFRP2	-2.82836	0.0144113		1.8413
ARL2	0.110166	0.397202		0.400989
TUBB4B	0.117642	0.892446		0.0494181
ANKRD13C	0.133168	0.396384		0.401884
TMOD1	-0.380653	0.0122145		1.91312
CHD1	0.256689	0.0279955		1.55291
RAB10	-0.0208426	0.849532		0.0708204
AHCTF1	-0.410739	0.02213		1.65502
MCF2L	-0.149971	0.558545		0.252942
ARFGAP1	-0.459412	0.0324389		1.48893
POC1B	0.0171007	0.774462		0.111
ST3GAL4	-0.458814	0.00508803		2.29345
STC2	0.568334	0.0638788		1.19464
RPL35	-0.33827	0.0193112		1.71419
OR52B2	0.38577	0.478584		0.320042
GOLT1B	-0.0630855	0.494802		0.305569
GOLM2	-0.316258	0.0384371		1.41525
CCBE1	0.104385	0.382518		0.417349
UBE2R2	-0.0756195	0.725425		0.139408
PCID2	-0.308632	0.045371		1.34322
GLUL	-1.2157	9.11631e-05		4.04018
NIBAN1	-1.01904	0.000201224		3.69632
ZDHHC3	0.115919	0.675207		0.170563
ARMH3	0.0631446	0.605438		0.21793
CYTH1	0.0478314	0.662193		0.179015
H1-0	0.178424	0.635296		0.197024
ITGA4	0.220374	0.27926		0.553991
TMEM50A	0.059071	0.845193		0.0730441
ADAM9	-0.782645	7.25183e-05		4.13955
PSMC2	-0.0600844	0.387284		0.411971
PRPF3	0.0750363	0.759393		0.119533
PPCS	0.475881	0.110673		0.955959
TPM4	-0.649032	0.000817775		3.08737
BHLHE40	0.0867155	0.524599		0.280173
CDADC1	0.274674	0.296509		0.527963
C5orf47	0.140733	0.588835		0.230007
SNRPF	0.168284	0.283412		0.547582
MME	0.416682	0.101184		0.99489
CXXC5	-0.275437	0.106532		0.972521
PHF1	0.0410636	0.772981		0.111831
COLEC12	-0.305575	0.075279		1.12333
EMC3	-0.233902	0.198507		0.702224
FADS1	-0.0565688	0.602038		0.220376
CBFA2T2	0.0788914	0.426221		0.370365
MLH1	-0.322937	0.171952		0.764593
VPS54	-0.109896	0.598495		0.222939
RAPH1	0.587119	0.00135086		2.86939
LIMS2	-0.581193	0.00121671		2.91481
RMDN1	-0.217235	0.125786		0.900367
SLFN11	0.613618	0.00895916		2.04773
OR6P1	0.273836	0.204802		0.688667
NKX1-1	0.322719	0.215016		0.667529
PAF1	0.162755	0.355354		0.449339
UBQLN1	-0.154384	0.327395		0.484928
DYNLL1	-0.1849	0.172138		0.764122
HEY1	0.63165	0.00762275		2.11789
COLGALT2	0.530491	0.0613364		1.21228
MGAT4A	0.267196	0.0890348		1.05044
DDT	-0.412624	0.0193772		1.71271
SKOR2	0.65745	0.00335722		2.47402
RASGRF2	0.462101	0.0713532		1.14659
SEPTIN6	0.0689224	0.71896		0.143295
MCRIP2	0.774219	0.000541865		3.26611
PXN	0.407559	0.217025		0.663491
ACLY	-0.558971	0.0351769		1.45374
C4orf46	1.78795	7.50502e-06		5.12465
HHLA3	0.109533	0.903051		0.0442877
DEDD	-0.130003	0.365793		0.436765
HELQ	0.424174	0.211066		0.675582
ZBTB3	0.144827	0.911804		0.0400984
HLA-DRA	0.543414	0.283371		0.547644
NOP2	0.173904	0.802861		0.0953597
SEC22A	0.0930726	0.677367		0.169176
CELF3	0.337329	0.167852		0.775072
RBM42	-0.206653	0.166561		0.778427
TTC39C	-0.240936	0.474285		0.323961
SPG21	-0.51219	0.16613		0.779553
MYSM1	-0.582259	0.0208692		1.68049
EVI2B	0.136802	0.868091		0.061435
ZC3H13	-0.0295826	0.666082		0.176472
COL5A3	0.144859	0.826065		0.0829856
AFAP1	-0.100129	0.457082		0.340006
DCTPP1	0.0794342	0.62681		0.202864
RFX7	0.224948	0.549137		0.260319
TMEM47	-0.706717	0.00942905		2.02553
RMDN3	0.105354	0.371418		0.430137
PCCB	0.0892888	0.767118		0.115138
TARDBP	-0.229018	0.110501		0.956632
ACBD7	0.601578	0.0269347		1.56969
NT5C2	-0.158794	0.549629		0.25993
TACO1	-0.183267	0.24946		0.602999
ABHD4	-0.267643	0.504035		0.297539
LRRC41	-0.241551	0.0455812		1.34121
KRTAP10-2	0.197824	0.508511		0.2937
SMURF2	0.0641291	0.722292		0.141287
ELK1	-0.556661	0.00944013		2.02502
FMOD	-0.534026	0.116082		0.935234
LAMB3	0.233761	0.289511		0.538335
ATG3	-0.535742	0.000291276		3.53569
EPM2AIP1	0.114302	0.629704		0.200864
TBXAS1	-0.153694	0.303356		0.518048
DDX5	-1.06072	2.88862e-05		4.53931
EPM2A	0.28907	0.43582		0.360693
SPOP	-0.0317635	0.836086		0.0777489
POC5	0.292087	0.173552		0.76057
CCNT2	-0.134304	0.561865		0.250368
INPP4B	0.090394	0.585242		0.232664
CRABP2	0.553861	0.00945694		2.02425
NR4A2	1.21021	0.0139964		1.85398
MRPS17	-0.000694296	0.635386		0.196963
MAN1A1	-0.672475	0.00324866		2.4883
ARHGAP9	-0.0754621	0.483335		0.315752
CP	0.096512	0.854845		0.0681125
CD3E	0.266253	0.337763		0.471388
DPT	-0.444647	0.0751962		1.1238
AICDA	0.3522	0.127677		0.893888
ZEB2	-0.498206	0.0068241		2.16595
RUFY3	-0.483539	0.0031176		2.50618
PLIN2	-0.390967	0.0487062		1.31242
USP53	-0.141379	0.457961		0.339172
AK4	0.311463	0.161177		0.792697
RPF2	0.0455299	0.646662		0.189323
SEL1L3	-0.425646	0.049393		1.30633
FCGR1A	0.507968	0.0116416		1.93399
CHGB	0.086954	0.523524		0.281064
WIPF1	-0.512771	0.00610439		2.21436
CEP95	0.367765	0.268374		0.57126
MSR1	0.442585	0.10287		0.987713
KDELR1	-0.551497	0.00384916		2.41463
MMP28	-0.24996	0.153258		0.814576
PSMB6	-0.314834	0.0279318		1.5539
FBXO6	0.0688442	0.94516		0.0244945
NREP	0.091037	0.752271		0.123626
MGAT2	-0.239548	0.0901002		1.04527
CD83	0.533505	0.00626499		2.20308
ROGDI	0.691363	0.00223535		2.65065
GREM2	-0.149431	0.302585		0.519153
RPS16	-1.01604	0.000270432		3.56794
ETV1	0.27213	0.181656		0.740751
C20orf96	-0.21394	0.197992		0.703352
TNRC6A	-0.575643	0.00919306		2.03654
ALOX12	0.323909	0.0486969		1.3125
ANKRD44	-0.447999	0.0134463		1.8714
FAM207A	0.243659	0.170151		0.769165
ABI1	-0.253616	0.0794118		1.10011
NPR2	-0.0131678	0.684247		0.164787
CHRDL2	0.0290483	0.312534		0.505103
KIAA0895L	0.368278	0.0149917		1.82415
CDK8	0.343616	0.0901063		1.04524
HPF1	0.395687	0.0850004		1.07058
TCF25	-0.166639	0.198257		0.702771
RTN4RL2	0.469484	0.00329711		2.48187
SLC5A10	0.435202	0.0128364		1.89156
ARHGAP10	-0.181694	0.212611		0.672415
CFD	-0.646519	0.0120779		1.91801
IGFBP4	-1.33317	0.00175582		2.75552
RPLP1	-0.923191	0.00130889		2.8831
EDC4	-0.0620834	0.697936		0.156185
CCDC47	-0.456671	0.00695059		2.15798
ATP1A2	-1.06984	0.510197		0.292262
RIPPLY3	0.242294	0.469258		0.328588
PYROXD1	0.366629	0.0532621		1.27358
SLC12A7	0.0145357	0.925212		0.0337589
PLAAT3	-0.260896	0.145478		0.837202
IL17RA	0.190343	0.886848		0.0521506
CD74	0.371087	0.694427		0.158373
INAVA	1.04348	0.129407		0.888041
SUCLG1	-0.0397903	0.708101		0.149905
IKBIP	0.702082	0.0616678		1.20994
ATRAID	-0.207773	0.15788		0.801672
NEUROD1	0.130045	0.455158		0.341837
GEMIN4	0.116641	0.366011		0.436506
RXRB	0.0664912	0.900171		0.0456749
AOX1	-0.474625	0.0162514		1.78911
CALB1	0.437833	0.0127797		1.89348
CCDC12	-0.237544	0.251836		0.598882
NOL9	0.225915	0.275722		0.559529
TM7SF3	-0.219655	0.219781		0.65801
ZNF723	0.274671	0.0861949		1.06452
FNDC1	-0.334852	0.152137		0.817764
SERPINB10	0.277776	0.166507		0.778567
DEFB112	0.144036	0.401827		0.395961
RAB21	-0.182833	0.504208		0.297391
PGLYRP4	-0.0367236	0.704185		0.152313
FGD3	0.192067	0.206739		0.684577
LRFN3	0.289071	0.230225		0.637847
MPC1	-0.207251	0.168839		0.772528
NBPF26	-0.101889	0.550055		0.259594
RPL17	-0.265627	0.0658613		1.18137
M6PR	-0.151557	0.370454		0.431266
HENMT1	0.32001	0.20091		0.696999
LAMB1	-1.23832	8.61028e-07		6.06498
WDR7	0.119697	0.494492		0.305841
IL6ST	-1.1642	7.48537e-06		5.12579
EIF5A	-0.527422	0.0558886		1.25268
TNS2	-0.153238	0.280068		0.552736
ATP5ME	-0.244114	0.072542		1.13941
RBIS	0.167199	0.166193		0.779388
DACH1	0.857055	0.000333336		3.47712
BCL2L2	-0.465427	0.00655841		2.1832
ALPK1	-0.0415357	0.83301		0.0793496
CNTNAP2	0.467426	0.105288		0.97762
CST3	-1.07864	4.05607e-05		4.39189
SERTAD3	0.527807	0.00344361		2.46299
C12orf29	-0.0256641	0.844025		0.0736446
POLDIP2	-0.0890082	0.337771		0.471378
MOCS3	0.158502	0.427188		0.369381
EHD1	0.314834	0.0270916		1.56717
HNRNPA2B1	-0.914397	0.000353551		3.45155
EIF3I	-0.252341	0.391914		0.406809
ARRDC3	-0.348871	0.508625		0.293602
GABARAPL1	0.189321	0.291061		0.536016
PPP1R10	-0.0780365	0.631459		0.199655
CDS2	0.00744617	0.997194		0.00122015
OSBPL5	-0.0677652	0.465802		0.331799
DDX41	0.0612062	0.495482		0.304972
ZG16B	0.997563	0.00110817		2.95539
EPYC	0.49552	0.0923659		1.03449
UBE2G1	-0.199779	0.300876		0.521613
RPTOR	0.383554	0.20945		0.67892
HMGCS1	0.64663	1.59821e-06		5.79637
RPA2	0.118177	0.576729		0.239028
FMO1	0.44016	0.235075		0.628794
MMP25	0.485476	0.0972715		1.01201
ACTR2	-0.57512	0.00178422		2.74855
FAM120C	0.169817	0.461958		0.335397
CTPS2	-0.314344	0.0771406		1.11272
PHACTR2	-0.0117266	0.950731		0.0219424
TEX30	0.0293255	0.92784		0.0325268
VEZF1	-0.262486	0.0586193		1.23196
HAPLN1	-0.308048	0.342761		0.465008
SMG5	-0.00337944	0.797895		0.0980542
LRCH1	-0.00999087	0.70162		0.153898
ANKMY2	0.258932	0.42846		0.368089
MARCHF7	-0.236655	0.188146		0.725505
SERPINB8	0.200575	0.158727		0.799349
TRIM17	-0.087888	0.507168		0.294848
BZW2	-0.0379617	0.680825		0.166964
LRRC20	0.666447	0.00523216		2.28132
STK4	-0.0255197	0.744482		0.128146
TUBG1	0.00112114	0.88052		0.0552606
ITGA8	-0.488108	0.0290683		1.53658
MBTPS1	-0.171455	0.330866		0.480348
SECISBP2	-0.0549562	0.85436		0.068359
C9orf72	0.263523	0.313924		0.503175
CNDP2	0.160244	0.647284		0.188905
COTL1	0.0378526	0.937853		0.0278654
XAF1	0.821247	8.60058e-06		5.06547
RPS29	-0.564563	0.0131681		1.88048
GDPD3	0.207513	0.209901		0.677986
TOB2	-0.161084	0.414369		0.382613
JMJD8	-0.13118	0.629909		0.200722
UFM1	-0.216758	0.0997856		1.00093
GRIK3	0.102835	0.606503		0.217167
NEDD4L	0.804614	0.0192683		1.71516
DNPEP	-0.111878	0.281383		0.550702
PDK1	-0.674735	0.032554		1.4874
ZNF740	-0.152953	0.646836		0.189206
PCNX1	-0.245438	0.0975503		1.01077
MEPCE	-0.639476	0.000566861		3.24652
PDE3B	-0.154037	0.650713		0.18661
ZMAT2	-0.185336	0.240083		0.619639
SEPTIN11	-0.46921	0.0203453		1.69154
ZC3H12A	0.440854	0.024758		1.60628
FAM81A	0.2172	0.309323		0.509588
SLC4A5	0.15114	0.617515		0.209352
ERICH4	0.408408	0.102063		0.991131
UFC1	-0.208846	0.221944		0.653756
ATP5PD	-0.136631	0.254224		0.594784
ADI1	-0.388787	0.0644743		1.19061
TRAK2	-0.144483	0.442809		0.353784
COPS6	-0.123656	0.344936		0.462261
TMEM241	0.206615	0.800939		0.0964007
EML6	0.024506	0.769756		0.113647
ESX1	0.345593	0.112733		0.94795
POU3F1	0.788229	0.0736811		1.13264
ATG2A	-0.19965	0.170275		0.768848
PLEKHG3	0.151877	0.510478		0.292023
PABPC4	-0.602256	0.000234566		3.62973
NDUFC1	-0.247622	0.104249		0.98193
OR9G4	0.700871	0.00477986		2.32058
ATOX1	-0.18607	0.272364		0.56485
VPS52	-0.0678292	0.517331		0.286232
CSRNP3	0.280709	0.144105		0.84132
TSPAN14	-0.0854213	0.614026		0.211813
GORASP1	-0.10186	0.393003		0.405605
RPS6KC1	0.0465154	0.911681		0.040157
RIN3	0.00132543	0.818852		0.0867945
CHIT1	0.164295	0.786318		0.104402
CCSER2	-0.550934	0.000428279		3.36827
LCAT	0.247661	0.357487		0.44674
DLGAP3	0.102042	0.374547		0.426494
CA5B	0.49885	0.0190424		1.72028
EPHB4	0.0606246	0.774033		0.111241
HCLS1	-0.466911	0.0319664		1.49531
JAK1	-0.54501	0.0161884		1.7908
U2AF2	-0.279349	0.0548597		1.26075
SFI1	0.196797	0.29355		0.532319
PGAM4	-0.165435	0.241942		0.616289
MUS81	-0.00161122	0.509755		0.292639
HCFC1R1	0.00676666	0.92507		0.0338255
DNAJA4	-0.204591	0.211047		0.67562
NRDE2	-0.00459603	0.820721		0.0858043
GOLGA7	-0.12273	0.415244		0.381697
TDG	0.316602	0.0624217		1.20466
IL26	1.11812	0.0695057		1.15798
FKBP4	0.179227	0.232216		0.634108
NANOS3	0.640742	0.00719427		2.14301
NCKAP5L	-0.231173	0.303883		0.517294
SKI	-0.395626	0.0251279		1.59984
MAPK8IP3	-0.403522	0.00458805		2.33837
MALSU1	0.382124	0.00969238		2.01357
MAP4K1	0.00818271	0.843126		0.0741076
CA4	0.647837	0.000187028		3.72809
JCHAIN	-1.83415	0.069901		1.15552
ADH1A	0.191379	0.299271		0.523935
FLNA	-2.3264	8.43647e-05		4.07384
ARMC9	-0.222966	0.288979		0.539133
TRMO	0.395035	0.196528		0.706574
GXYLT2	-0.326065	0.145244		0.837901
NPM3	-0.0646872	0.543401		0.26488
NGRN	0.121322	0.688889		0.161851
BORCS7	-0.375316	0.142601		0.845877
NSUN5	-0.216365	0.130436		0.884603
STIM1	-0.132969	0.226557		0.644822
NAA40	0.164462	0.287751		0.540983
HOMER3	-0.272429	0.278971		0.554441
LRP3	-0.420602	0.0060072		2.22133
OLR1	1.20218	0.000568263		3.24545
IREB2	0.0919226	0.661534		0.179448
UPK1A	0.133212	0.600967		0.22115
PHOSPHO2	0.182523	0.576994		0.238829
MMP19	0.228156	0.36519		0.437482
ATG9A	-0.386685	0.175487		0.755755
TTC14	0.0203578	0.980233		0.00867051
CITED2	-0.782271	0.00232692		2.63322
GP1BA	0.283557	0.147142		0.832263
LMO2	0.223501	0.329811		0.481735
CDC42BPB	0.0977433	0.580399		0.236273
C1orf122	-0.212344	0.476717		0.32174
ABCA9	0.242664	0.217002		0.663537
RAB27A	0.324145	0.208871		0.680123
DERL3	-0.699107	0.0421066		1.37565
TCF23	0.308411	0.0664465		1.17753
UROD	0.0908531	0.390614		0.408253
TMEM9	-0.0291711	0.976137		0.0104894
GNAS	-0.70619	0.00542764		2.26539
TSPAN31	-0.129742	0.48601		0.313355
SREBF1	0.139187	0.440834		0.355725
RHOBTB2	-0.383518	0.134754		0.87046
NFIC	-0.919535	1.86138e-05		4.73017
ZMYND11	-0.33617	0.0423755		1.37288
INVS	0.440229	0.145517		0.837087
COX7C	-0.496276	0.0142164		1.84721
SLURP1	0.269154	0.340033		0.468479
PIAS3	0.0383526	0.972427		0.0121431
NBPF6	0.514773	0.00424343		2.37228
LENG8	-0.693073	0.000115189		3.93859
MPHOSPH6	-0.218033	0.209515		0.678785
STARD9	0.250604	0.144723		0.839461
PER3	0.170416	0.844134		0.0735887
ALDH3B2	0.134631	0.534421		0.272117
TMEM208	-0.14834	0.277751		0.556344
FNDC3B	-0.316139	0.03264		1.48625
POMGNT1	-0.0974221	0.810438		0.0912804
NDUFA3	0.0683499	0.634376		0.197653
FBXO46	0.536506	0.176429		0.753431
SP140L	0.239639	0.276703		0.557986
RMND1	-0.0118325	0.574131		0.240989
GAS7	-0.171537	0.500552		0.30055
IARS2	-0.124037	0.239383		0.620907
PLCB2	0.320931	0.160149		0.795475
ADGRD2	0.321556	0.0629253		1.20117
TENT4A	-0.299724	0.0558094		1.25329
ZNF410	0.200074	0.202732		0.693079
NEK10	0.131492	0.890829		0.0502055
ZNF613	0.0322537	0.992736		0.00316637
CDC42EP3	-0.882107	0.0013342		2.87478
DPCD	0.304847	0.0796414		1.09886
EPB41L2	0.0503501	0.643019		0.191776
UBXN4	-0.131326	0.333887		0.4764
RBM11	0.416193	0.0977252		1.00999
DDB2	0.033996	0.994106		0.00256742
RNPEPL1	-0.0423137	0.873726		0.0586247
MSRA	-0.382641	0.0603309		1.21946
LRRN4	0.801402	0.000475496		3.32285
COG7	0.318363	0.149145		0.826392
IMMP1L	0.386152	0.0698164		1.15604
SGSH	-0.220232	0.398201		0.399898
MARCKSL1	0.139111	0.385917		0.413506
ATR	0.403267	0.231624		0.635216
AQP10	0.573354	0.0701576		1.15393
ZIC3	0.608669	0.00018885		3.72388
FAXDC2	-0.00996467	0.682102		0.16615
PPA2	0.283101	0.222183		0.653289
DLGAP4	-0.342395	0.0382623		1.41723
C2	0.0695422	0.786059		0.104545
PLAA	0.17032	0.375884		0.424946
THOC7	-0.371491	0.102376		0.989803
TTLL12	-0.174185	0.255145		0.593213
ASPSCR1	0.0833483	0.402395		0.395347
USP17L15	0.842909	0.00350981		2.45472
BIRC6	-0.430927	0.0170248		1.76892
YIPF6	0.0181132	0.90804		0.0418951
CAMK2N2	0.163411	0.450791		0.346025
MGAT5	0.262573	0.37908		0.42127
NAGK	0.0743619	0.840755		0.0753305
NOC3L	-0.140713	0.383695		0.416014
TMEM214	-0.631246	0.00196087		2.70755
SRPX	-0.858027	0.000192938		3.71458
ASZ1	0.167793	0.806813		0.0932272
CD69	-0.0833827	0.936202		0.0286303
N4BP1	0.282438	0.24699		0.60732
PDS5A	-0.356865	0.00865403		2.06278
SIRT1	-0.0553586	0.376994		0.423666
RPL27	-0.819604	9.52245e-05		4.02125
LIN54	0.407234	0.116677		0.933016
BRWD3	-0.0774067	0.974861		0.0110575
RAET1G	0.626173	0.000622264		3.20603
TUBGCP6	-0.0249473	0.799502		0.0971804
PEA15	-0.36597	0.0184407		1.73422
ELL3	-0.051765	0.600838		0.221243
GNAI1	0.0273546	0.984775		0.00666281
LGALS7B	0.495155	0.0736765		1.13267
DAB2	-0.455045	0.00325145		2.48792
EMP3	-0.34052	0.0915861		1.03817
NMRK2	0.254952	0.58357		0.233907
CAT	0.330852	0.205043		0.688155
ATP5F1C	-0.101571	0.401826		0.395962
TPCN1	-0.0675311	0.485189		0.314089
GPR89A	0.323176	0.0653594		1.18469
ATP1B1	-0.619049	0.00385854		2.41358
SGSM3	-0.0982201	0.490298		0.30954
TFG	0.190461	0.327354		0.484983
TMEM174	0.0181604	0.650932		0.186464
TMEM131L	0.334395	0.0481944		1.317
KCNH3	0.502119	0.0493431		1.30677
PRXL2A	0.141635	0.251742		0.599044
RNF121	-0.0317541	0.772738		0.111968
LRP1	-0.567151	0.00118831		2.92507
UBE2A	-0.0791769	0.583576		0.233903
CCDC9	0.272521	0.14925		0.826085
ABCB8	0.218208	0.156773		0.804728
MLX	0.0374738	0.765494		0.116058
KLB	0.404187	0.0217657		1.66223
WWC1	0.00779933	0.991128		0.00387039
CYP2R1	-0.0435589	0.653472		0.184773
USF1	0.0538893	0.969503		0.0134507
KIAA0754	0.298182	0.0525272		1.27962
CRIP2	0.258646	0.170136		0.769204
TRIM51	0.765712	0.00244059		2.6125
CABP4	0.726422	0.145408		0.837412
PIK3R3	0.587332	0.00764029		2.11689
THEGL	0.70782	0.00118489		2.92632
KCTD11	0.643634	0.0079174		2.10142
HECA	-0.0446558	0.919911		0.0362542
MMADHC	-0.205428	0.254941		0.59356
BPNT2	0.0937427	0.735071		0.133671
UBE2K	-0.706151	0.00170807		2.7675
NPC2	-0.698342	0.0596688		1.22425
SNRPE	0.696356	0.000166721		3.77801
HDGFL2	-0.102508	0.792458		0.101024
INHBA	0.160599	0.489367		0.310365
PLAT	-0.0651665	0.643334		0.191563
TMEM74B	0.0410489	0.868084		0.0614381
GOLGA3	-0.424738	0.00279241		2.55402
SNAPC1	-0.00402217	0.912225		0.0398979
SCAF11	0.0162354	0.976296		0.0104186
COL4A5	-0.548369	0.0136547		1.86472
OIT3	0.345765	0.475603		0.322755
HIPK2	-0.123892	0.479453		0.319254
RNF213	0.0208795	0.921066		0.0357093
TUBE1	0.0534698	0.841285		0.0750568
MAP1LC3B	-0.564746	0.00306814		2.51313
CDK2AP2	0.523012	0.011418		1.94241
CADM1	0.58629	0.298824		0.524585
MTG1	-0.0819173	0.657572		0.182057
NCAPH	0.420892	0.0119623		1.92218
P2RX2	0.517008	0.0990748		1.00404
COL6A3	-2.39433	4.15931e-05		4.38098
RRP1B	0.262642	0.238872		0.621834
WFDC1	-0.0777486	0.609936		0.214716
NDUFA6	0.175918	0.460636		0.336642
SUN2	-0.663994	2.94356e-05		4.53113
BCLAF1	0.240887	0.0486496		1.31292
OR1L1	0.910404	0.00495756		2.30473
THOC2	-0.376768	0.123178		0.909466
PEPD	-0.348416	0.0662822		1.1786
COL4A2	-0.651898	0.00818047		2.08722
C10orf62	0.0544903	0.744444		0.128168
FRS2	-0.12839	0.384438		0.415174
FSTL1	-1.32415	4.85426e-05		4.31388
GORAB	0.566699	0.00737521		2.13223
ANKH	-0.527024	0.00151045		2.82089
ARHGEF18	0.136887	0.424743		0.371874
MAST4	-0.0124494	0.842726		0.0743134
CNOT8	-0.181684	0.215288		0.66698
DCTN4	-0.711045	0.000235224		3.62852
TPMT	0.271573	0.0849944		1.07061
DDX46	-0.427098	0.0282705		1.54867
SBNO2	0.0359575	0.737981		0.131955
CLCC1	-0.0418404	0.639486		0.194169
MZF1	-0.126284	0.30944		0.509424
RNF7	-0.3699	0.0289109		1.53894
TMCO1	-0.351445	0.0297337		1.52675
AP3M1	0.115755	0.464809		0.332726
CDK4	-0.366076	0.0173081		1.76175
MFHAS1	0.194951	0.318357		0.497085
LGMN	-0.496689	0.00193687		2.7129
RBM26	-0.0269157	0.839027		0.0762241
EGFLAM	0.00457458	0.910689		0.0406299
CCDC184	0.741724	0.000129197		3.88875
MRPL41	-0.512379	0.00417131		2.37973
SLC22A10	0.462624	0.202981		0.692544
OAS3	0.204137	0.426172		0.370415
MOV10	-0.273079	0.202678		0.693193
SPATA18	-0.23975	0.165723		0.780616
ARL16	-0.0393436	0.864478		0.063246
SP100	-0.161468	0.17916		0.746758
PALM2AKAP2	0.513722	0.0214763		1.66804
SLC50A1	0.46701	0.00423739		2.3729
PHF11	0.114462	0.362357		0.440863
CYP2C18	0.176694	0.261279		0.582895
UBALD2	0.41161	0.0279945		1.55293
SYNJ2	-0.385188	0.0186012		1.73046
FADS6	0.382443	0.106053		0.974477
MEIS3	-0.439808	0.164755		0.783162
ZNF24	0.183603	0.160278		0.795126
MLST8	0.222692	0.212731		0.672169
PCDH20	0.310419	0.176076		0.754299
SOX9	-0.00375206	0.834363		0.0786448
C5orf15	-0.0790829	0.511367		0.291268
TMEM59	-0.292087	0.0637096		1.19579
STRN3	-0.280152	0.111693		0.951972
ARID1B	-0.321746	0.0290122		1.53742
PFDN2	-0.302688	0.145645		0.836704
IKZF5	0.249199	0.187753		0.726413
GPRASP2	0.450975	0.124988		0.903133
KIRREL1	-0.622793	0.00670901		2.17334
ATP6V1G2	1.18196	0.0051855		2.28521
BAG3	0.210026	0.258812		0.587016
KCNJ11	-0.276152	0.142498		0.84619
GJA1	0.140423	0.328374		0.483632
RNF10	0.160209	0.435806		0.360707
RANBP10	0.148244	0.294796		0.530478
GPR158	0.352675	0.0552262		1.25786
TMEM178A	0.146344	0.52783		0.277506
ZXDC	-0.127589	0.422187		0.374496
ABLIM1	0.186302	0.202391		0.693808
PGK2	0.243543	0.406856		0.390559
AKT2	-0.331179	0.0375536		1.42535
PCIF1	-0.115328	0.448355		0.348378
TRAF5	-0.206407	0.171183		0.76654
COL15A1	-1.14622	0.000511488		3.29116
UPK3BL1	0.108683	0.763104		0.117416
MAS1L	0.815552	0.034382		1.46367
KCNH4	0.244449	0.699823		0.155012
KRTAP10-4	0.293427	0.239389		0.620896
RAD51AP1	0.429025	0.0585228		1.23267
PELI1	-0.126719	0.768282		0.11448
ZNF444	0.217553	0.158153		0.800923
ESYT1	-0.229168	0.112164		0.950147
CYP26A1	0.230585	0.741835		0.129692
BPIFB1	-0.14408	0.366331		0.436126
LPP	-1.2806	2.32736e-06		5.63314
AGAP3	-0.488313	0.0105395		1.97718
FAM243A	0.494817	0.0931447		1.03084
TRIM56	-0.160163	0.185838		0.730865
SAMD15	-0.00595408	0.636664		0.19609
CHID1	-0.472052	0.000396109		3.40218
AKR1E2	-0.0013057	0.971722		0.012458
CCNB3	0.309785	0.305921		0.51439
IRX3	0.498812	0.153887		0.812799
CCL17	0.341203	0.707332		0.150377
DCTN2	0.150943	0.32634		0.486329
CALM3	-0.2003	0.259294		0.586208
HIGD2A	-0.0178983	0.732804		0.135012
PURB	-0.0978168	0.417089		0.379771
KLF11	0.457782	0.0726392		1.13883
STON1	-0.228284	0.202872		0.692777
PDIA6	-0.5656	0.00120948		2.9174
CAPS	-0.126462	0.5006		0.300509
RUFY1	0.067945	0.980169		0.00869893
OLFML1	0.112302	0.714846		0.145787
CDC73	-0.265293	0.133715		0.873819
MYL3	0.172865	0.620454		0.20729
RRBP1	-0.855144	0.000424035		3.3726
LST1	0.374323	0.0989699		1.0045
SOGA1	-0.0797128	0.52829		0.277127
NRBF2	0.260269	0.254029		0.595116
ZNF101	0.0203743	0.874173		0.0584025
FKBP11	0.272453	0.85671		0.0671663
FKBP10	-0.680433	0.00139477		2.8555
F8A2	0.0457927	0.811419		0.0907549
SPATA31E1	0.47372	0.13047		0.884491
RABAC1	-0.155842	0.25405		0.595081
PTBP1	-0.240815	0.0278439		1.55527
CSNK1G3	0.0103629	0.550514		0.259232
NXF1	-0.617168	6.46417e-05		4.18949
GNG12	-0.782588	3.62188e-05		4.44107
CCDC69	-0.0578666	0.572952		0.241882
PIK3CA	0.129894	0.580568		0.236147
TRANK1	-0.0502427	0.553805		0.256643
WFDC10B	0.08746	0.531691		0.274341
STX4	-0.160321	0.238755		0.622047
GPATCH3	0.326915	0.01281		1.89245
NAT8B	0.521901	0.00541653		2.26628
GSTP1	-0.124675	0.395766		0.402562
EGR1	0.504541	0.043316		1.36335
SBF2	0.00301493	0.868938		0.061011
FCN3	0.114748	0.917792		0.0372558
ACTRT2	0.504637	0.0479582		1.31914
GOLGA8F	0.759037	0.000620638		3.20716
PEBP1	-0.69897	0.000869382		3.06079
MGME1	0.0117621	0.790872		0.101894
CYTH3	0.214392	0.184312		0.734447
OR2A1	0.374924	0.055266		1.25754
BMP4	-0.27698	0.250265		0.6016
LAT	0.236854	0.186174		0.73008
TAX1BP3	-0.327667	0.107756		0.96756
KCNU1	0.260939	0.113876		0.943567
REG3G	0.522866	0.0234295		1.63024
EAF2	-0.0698929	0.844897		0.073196
ZNF136	0.248078	0.106194		0.973899
CYB5R3	-0.263094	0.0624378		1.20455
GPLD1	-0.130127	0.54077		0.266988
FCER1G	0.0842936	0.870811		0.0600762
WFS1	0.198592	0.5629		0.249569
SLC38A2	-0.684088	0.00454737		2.34224
SAMD3	0.175773	0.380284		0.419892
KRTAP12-3	0.777487	0.000936998		3.02826
SETD1A	0.201557	0.394063		0.404434
SVOPL	0.367691	0.074635		1.12706
RASGRF1	0.235472	0.236105		0.626895
ATXN1L	0.0168894	0.85391		0.0685878
MBNL2	-0.594468	0.00819322		2.08655
ATP5MF	-0.140777	0.372142		0.429291
TRIM23	0.0152619	0.932966		0.0301343
LSM3	0.238728	0.105593		0.976365
C1QB	-0.0914716	0.836627		0.077468
MARVELD3	0.716548	0.00449602		2.34717
ANKRD37	0.0840673	0.712967		0.146931
RASSF4	0.368456	0.104634		0.980327
HTATIP2	0.222921	0.273995		0.562257
UBE2N	0.203675	0.295859		0.528915
MAFB	0.432761	0.452902		0.343996
MTMR3	0.066249	0.759633		0.119396
PER1	-0.0973171	0.94521		0.0244715
COX15	0.110164	0.459647		0.337576
INCENP	0.332106	0.137675		0.861145
ZBTB16	-1.40875	2.21468e-05		4.65469
SIL1	0.0643467	0.653142		0.184993
FAHD2B	0.24264	0.299266		0.523942
EFL1	-0.108841	0.258769		0.587088
DDX1	-0.373458	0.0967098		1.01453
RASA2	-0.185735	0.162025		0.790418
IRF2BP1	-0.0250568	0.653326		0.18487
CTAGE9	0.757783	2.13862e-05		4.66987
TMEM14C	-0.268732	0.130088		0.885763
BAGE3	0.64476	0.00249848		2.60232
BRMS1	0.323329	0.194648		0.71075
CAMK1G	0.217973	0.206821		0.684406
CACNA2D2	0.671814	0.137716		0.861014
P4HA2	-0.304838	0.0634711		1.19742
PLEKHM1	0.0645315	0.641584		0.192746
MARF1	-0.00756365	0.75229		0.123615
LRFN1	0.654247	0.0126055		1.89944
COPS2	-0.414269	0.00176681		2.75281
CCDC28A	-0.0353104	0.495225		0.305197
SHC1	-0.505656	0.0402131		1.39563
SLC22A31	0.435115	0.30049		0.52217
RPL38	-0.577005	0.0116545		1.93351
SLC9A9	-0.183975	0.222186		0.653283
FAM131A	-0.546163	0.0703027		1.15303
ITPRIPL2	0.40455	0.346016		0.460904
MVB12A	-0.153602	0.526375		0.278705
DAP	0.00111835	0.933826		0.0297338
SDF2L1	0.281948	0.385673		0.413781
SUB1	0.17094	0.480448		0.318354
PSG11	0.116227	0.568744		0.245084
FBRSL1	0.0296065	0.987096		0.0056407
MBP	0.365237	0.134084		0.872623
MPV17L2	0.136335	0.497519		0.303191
TRAF7	-0.41259	0.000887361		3.0519
NAAA	-0.0435668	0.656817		0.182556
CDV3	-0.784209	9.69678e-05		4.01337
SH3BGR	0.647531	0.0168787		1.77266
DPH3	0.390329	0.141353		0.849694
HPS5	0.059531	0.609774		0.214831
ALG10B	0.916652	1.10058e-05		4.95838
ITK	0.2021	0.806083		0.09362
RAI1	0.0179057	0.988351		0.00508883
KANSL1	-0.336282	0.0571792		1.24276
HEG1	0.123097	0.70833		0.149764
TMC8	-0.0291411	0.832293		0.0797238
EIF4EBP1	-0.103533	0.527218		0.278009
PDIA4	-0.978392	1.39557e-05		4.85525
FAM168A	-0.0379805	0.911567		0.0402116
SLC16A1	0.114426	0.690676		0.160726
CDK19	0.108916	0.46539		0.332183
NBL1	-1.26188	2.18796e-06		5.65996
OPRD1	0.28616	0.300076		0.522769
ANAPC4	-0.696002	0.012855		1.89093
MDN1	0.0296301	0.882946		0.0540657
ABCG1	-0.114657	0.507539		0.294531
DDA1	0.526543	0.000674714		3.17088
KLHL7	-0.232081	0.155973		0.806951
ARID1A	-0.307654	0.0822159		1.08504
HDAC3	-0.146045	0.444467		0.35216
CXCL8	1.14726	0.00144661		2.83965
SPIN2B	0.28697	0.0193901		1.71242
TOR1A	-0.115973	0.480148		0.318625
SERPINA3	-0.725301	0.0380696		1.41942
OR52R1	0.27806	0.328415		0.483577
CFI	0.0361116	0.803438		0.0950478
SAPCD2	0.630137	0.00356164		2.44835
PRKAR1B	0.244047	0.251971		0.59865
HBA2	1.39237	0.051581		1.28751
HOXC10	0.476832	0.00265851		2.57536
PPAT	0.305026	0.0985397		1.00639
MAP3K7	-0.10905	0.467297		0.330407
OR8G1	0.760372	0.000177308		3.75127
CACNA1C	-0.298407	0.0481061		1.3178
GRIA1	0.477631	0.0440449		1.3561
FAM102A	-0.0850373	0.580141		0.236466
G6PC3	0.226468	0.386354		0.413014
RMND5A	-0.027279	0.838683		0.0764022
GALC	-0.55126	0.0304243		1.51678
NRG4	0.380884	0.236598		0.625988
CAMK2D	-0.289602	0.135563		0.867858
PSMB2	-0.607144	0.00528412		2.27703
GPD1L	0.175016	0.391594		0.407164
CZIB	-0.0717597	0.415388		0.381546
HR	0.159702	0.441421		0.355147
IGFBP5	-2.42534	0.000752739		3.12336
SLC4A7	-0.396988	0.0154578		1.81085
CDIPT	-0.378569	0.0317464		1.49831
CCDC59	0.263176	0.0588919		1.22994
CEACAM5	0.248664	0.132537		0.877661
TARBP2	0.0392631	0.587023		0.231345
UGT2B11	0.311308	0.106189		0.973921
HLA-DOA	0.184084	0.693952		0.15867
HMOX1	0.152248	0.706701		0.150764
DNALI1	0.317208	0.0757204		1.12079
FCGRT	-0.292841	0.0693058		1.15923
PIBF1	0.0216463	0.896324		0.047535
CDC34	-0.120596	0.942436		0.0257483
PLEKHG4	0.075572	0.974245		0.0113318
CYP4B1	0.787479	0.118009		0.928084
PPAN	-0.218749	0.201414		0.695911
CT47B1	-0.243874	0.122488		0.911907
CANT1	-0.00237736	0.873581		0.0586966
AKT3	0.0451279	0.994401		0.00243839
NT5DC2	-0.609959	0.00322143		2.49195
H2AC21	-0.298698	0.0968817		1.01376
RASSF6	0.277721	0.422803		0.373862
POU5F1	0.457232	0.0048998		2.30982
ST3GAL1	-0.115053	0.373239		0.428013
RXRA	-0.220641	0.0963695		1.01606
FGD4	0.561116	0.00462078		2.33528
PNPLA5	0.493829	0.00373219		2.42804
MUC1	-0.0395171	0.32608		0.486676
SART1	-0.112685	0.673872		0.171423
PROSER3	0.372919	0.203598		0.691226
GFPT1	-0.180169	0.285105		0.544995
LARP4B	-0.197426	0.362335		0.44089
CDH5	0.59002	0.00610133		2.21458
CAMKV	0.240935	0.180469		0.743598
CLIP2	0.100064	0.867366		0.0617977
EVA1B	0.205176	0.446133		0.350535
CNIH1	-0.0655673	0.504594		0.297058
CPLANE1	-0.271898	0.253826		0.595464
NMNAT1	-0.0450282	0.804658		0.0943888
MSRB1	-0.096515	0.467402		0.330309
RPL13	-1.12278	0.000509195		3.29312
SYT15	0.838882	0.000233152		3.63236
FABP5	1.10966	3.76127e-05		4.42467
RAD9A	0.480762	0.000250607		3.60101
DNAJC5	-0.54892	0.0847361		1.07193
TCEAL1	-0.840029	0.000335245		3.47464
LONRF3	0.0707903	0.892411		0.0494353
ZNF649	0.210903	0.242136		0.61594
RASSF3	-1.36262	1.91756e-05		4.71725
IL13RA2	-0.357388	0.13156		0.880877
ARL2BP	0.0937082	0.534127		0.272356
CHD9	0.276504	0.0727529		1.13815
BCKDHB	0.27073	0.463843		0.333629
TSHZ2	0.0396824	0.585012		0.232836
PRKAR1A	-0.487368	0.0149032		1.82672
CLPP	0.040945	0.946925		0.0236843
ZNF548	0.036614	0.866764		0.0620991
SMARCB1	-0.12774	0.642422		0.19218
CLEC3B	0.463915	0.0665785		1.17667
ZNF577	-0.14126	0.619641		0.20786
TAP2	0.407468	0.0472903		1.32523
FXN	0.158602	0.681384		0.166608
AVPR1B	0.0272601	0.849826		0.0706698
FAM13A	0.171009	0.359543		0.444249
PTPMT1	0.0479797	0.611224		0.213799
HSPD1	0.00921619	0.874184		0.0583973
LAMB2	-0.70013	0.00216785		2.66397
GAS6	-1.00299	0.00147706		2.8306
NPAS2	-0.0572074	0.763073		0.117434
PDGFB	0.534254	0.0646903		1.18916
NDUFA11	-0.357477	0.0184465		1.73409
CYP2D6	0.398602	0.0607011		1.2168
CETP	0.197585	0.261295		0.582869
NSG1	0.296036	0.162165		0.790044
MT1A	0.0367403	0.739276		0.131194
SBSN	0.183512	0.396797		0.401431
ANXA5	-0.594728	0.00874279		2.05835
COA5	0.0268888	0.818543		0.0869584
RAB28	0.17072	0.65262		0.18534
TINAGL1	-0.650541	0.000719038		3.14325
RAB11FIP5	-0.0120245	0.786941		0.104058
SUPT5H	-0.328575	0.0546771		1.26219
PPM1K	0.505985	0.000958254		3.01852
SLC52A3	0.00232528	0.877339		0.0568327
DPPA3	0.641606	0.000233369		3.63196
SMIM30	0.10741	0.822885		0.0846608
UVRAG	0.0494983	0.673957		0.171368
EGR4	0.390457	0.127415		0.894781
MIER1	-0.1734	0.181765		0.740491
DENND5A	-0.127612	0.374336		0.426739
CCN2	-1.22614	0.011831		1.92698
ADRB1	-0.370646	0.118156		0.927544
RETREG3	-0.15837	0.26569		0.575625
ISLR	-0.278672	0.0553282		1.25705
ZNF703	-0.212512	0.395745		0.402584
DLAT	-0.0104342	0.932563		0.0303217
ZNF550	0.699329	0.0196226		1.70724
MRTFB	-0.0107992	0.881078		0.0549855
SRSF4	0.142031	0.305631		0.514803
TRA2B	-0.0214359	0.908443		0.0417024
ST14	-0.0557112	0.622858		0.205611
TRAPPC13	-0.123855	0.617467		0.209387
TNRC18	-0.270978	0.0606022		1.21751
LCNL1	-0.0881405	0.95359		0.0206383
OR4D2	0.0884179	0.763205		0.117359
NBPF15	0.00250387	0.890873		0.0501842
IL34	-0.0950015	0.527479		0.277795
H2BC4	0.0446339	0.887973		0.0516002
LILRB3	0.285109	0.4613		0.336017
PIANP	0.201106	0.343234		0.464409
UBE2J1	0.0603653	0.838851		0.076315
WAS	-0.261362	0.0489619		1.31014
DIAPH2	-0.233113	0.240127		0.619559
WDTC1	0.160546	0.385801		0.413637
TMEM179B	0.163256	0.178097		0.749342
SOCS3	0.946754	0.0306541		1.51351
C1QL2	0.322472	0.191837		0.717068
KCNG2	-0.0774572	0.660498		0.180128
GJC2	0.329998	0.0420591		1.37614
COX5B	-0.0340266	0.534934		0.271699
COX14	-0.33871	0.0901225		1.04517
ASPN	-0.741386	0.000920137		3.03615
IL1RL1	-0.324834	0.0956018		1.01953
SLC25A47	0.450278	0.000934847		3.02926
DHX16	-0.0216434	0.711685		0.147712
BZW1	-0.175579	0.282162		0.549501
ATF4	-0.594154	0.00267388		2.57286
CCDC89	0.464692	0.0582428		1.23476
FAM120AOS	-0.0557269	0.496354		0.304209
TIMM22	0.641453	0.00472197		2.32588
S100A13	-0.252485	0.0658447		1.18148
SAR1A	0.205042	0.373307		0.427934
CD37	0.028603	0.594584		0.225787
DENND2D	-0.269836	0.155387		0.808586
TMEM33	-0.102704	0.543581		0.264736
ALDOA	-0.987721	0.000184928		3.733
ZFP82	-0.119988	0.47965		0.319075
LRRFIP1	0.0853708	0.657166		0.182325
C2orf91	0.260978	0.178699		0.747877
FUT7	0.409802	0.267068		0.573379
DCK	0.230275	0.509157		0.293148
TRIM21	-0.0357504	0.897173		0.0471239
IL18R1	-0.495091	0.0163769		1.78577
TMPRSS3	-0.0771647	0.545389		0.263294
HAS3	0.417305	0.169262		0.771439
SNRPB	-0.129098	0.185423		0.731837
GON7	-0.0642759	0.43366		0.362851
KRTAP10-10	-0.125291	0.715888		0.145155
CRY1	0.394828	0.0395348		1.40302
ZC3H7B	-0.117157	0.379578		0.420699
SEC61A1	-0.734735	0.00342746		2.46503
GTF3C3	-0.22263	0.212186		0.673284
C12orf57	-0.311257	0.0715652		1.1453
YAP1	-0.729167	0.000430068		3.36646
EMC10	-0.425172	0.00880716		2.05516
ARHGEF38	0.0698656	0.861236		0.0648776
TLE5	0.0353913	0.854969		0.0680497
NKD1	0.0936141	0.525169		0.279701
DTD1	0.0340699	0.917965		0.0371738
TRIO	-0.441368	0.0224923		1.64797
ITGB4	-0.071621	0.494748		0.305616
POLR1C	0.5809	0.277396		0.5569
KCNJ4	0.421884	0.0905504		1.04311
REEP5	-0.264704	0.252338		0.598017
ADA	0.0848367	0.593779		0.226376
PPP1R12C	-0.372709	0.0327657		1.48458
ANKRD36	0.184302	0.0678371		1.16853
VIT	0.53552	0.0133737		1.87375
CMPK2	0.443981	0.054752		1.2616
METTL11B	0.259388	0.155469		0.808356
SCARA3	-0.62173	0.00450846		2.34597
XPO1	-0.315413	0.097144		1.01258
MORN3	0.381446	0.103469		0.985192
RPL37	-0.781168	0.00369978		2.43182
CIB1	-0.149682	0.268554		0.570969
ARNT2	-0.211307	0.209541		0.678731
SAV1	0.455998	0.133546		0.874368
ARAP2	0.707042	0.000316323		3.49987
COX4I1	-0.421327	0.0207654		1.68266
PCGF6	0.243198	0.285479		0.544426
NF1	-0.569916	0.00239262		2.62113
MFN1	0.205602	0.281329		0.550786
ATP5PB	0.0422774	0.706124		0.151119
EPHB6	0.238555	0.334101		0.476122
EGFR	-0.145268	0.355953		0.448607
H2AC6	-0.0973086	0.502561		0.298811
TXNRD2	0.0444187	0.919752		0.0363291
AKAP8L	0.00659663	0.968891		0.013725
TRIB1	0.663514	0.0367665		1.43455
ZNF470	0.0323134	0.973389		0.0117136
NDUFB4	-0.108952	0.305828		0.514522
DUSP6	0.149816	0.727193		0.13835
NDUFS4	-0.127214	0.779233		0.108333
FAM189A1	0.639515	0.205885		0.686375
RBM48	0.351338	0.280472		0.552111
FN3KRP	0.200373	0.980256		0.00866032
CDC5L	0.0322729	0.691863		0.15998
CLIP3	-0.418094	0.0296092		1.52857
ATP6V0E1	0.0575648	0.83542		0.0780953
MTSS2	-0.225025	0.205202		0.687818
CASKIN2	0.357062	0.0949342		1.02258
CDPF1	0.437897	0.00336291		2.47328
DGLUCY	-0.264715	0.146693		0.83359
UBE2V1	-0.210519	0.14092		0.851026
SOCS7	0.293735	0.0598443		1.22298
PPP1R15A	0.450759	0.0664501		1.1775
RNF4	0.115151	0.6316		0.199558
ACSS3	0.0907822	0.918603		0.0368723
EIF4E1B	0.666395	0.0614126		1.21174
ZNF185	-0.176533	0.327072		0.485356
ANAPC10	0.271123	0.272727		0.564271
KIF2B	0.26808	0.168664		0.772978
NCK1	0.106523	0.84127		0.0750644
SPAG11A	0.403797	0.0632823		1.19872
CCL1	0.994559	0.155886		0.807192
SLC12A9	0.0551687	0.887928		0.0516222
DNAJC8	0.197863	0.238751		0.622055
SPINK2	0.462851	0.0427126		1.36944
CLPB	0.284601	0.0447383		1.34932
ELOVL5	0.660204	4.47647e-07		6.34906
FLOT2	0.163435	0.51269		0.290145
DDIT3	0.242396	0.190775		0.719478
SET	-0.580755	0.014797		1.82983
PPP1R7	-0.247178	0.0845121		1.07308
RNF133	0.248885	0.189498		0.722396
EML1	0.135746	0.835748		0.0779246
HSPBAP1	0.142652	0.330849		0.48037
FAS	0.532164	0.064328		1.1916
NHP2	0.145195	0.509686		0.292697
HECTD4	-0.116036	0.406234		0.391224
NELFCD	0.496578	0.0338549		1.47038
AMBRA1	-0.140265	0.440591		0.355964
SOX6	-0.14947	0.823394		0.0843923
CDCA7	-0.241999	0.182441		0.738877
ZPR1	0.583008	0.0572087		1.24254
TGFBR2	-0.644828	0.000245692		3.60961
MTA2	-0.175057	0.344565		0.462729
S100A11	-0.162182	0.321051		0.493426
MRPL53	0.0455024	0.926361		0.0332197
NAMPT	0.288453	0.120098		0.920464
GNAQ	0.176115	0.406981		0.390426
FHIP1B	0.0261361	0.879359		0.055834
EMC8	-0.197763	0.181396		0.741372
CAPNS1	-0.244765	0.208355		0.681197
CD164	-0.580497	0.00251726		2.59907
FAM153B	0.524081	0.00459433		2.33778
CAPN7	-0.193685	0.320002		0.494847
ATG16L1	-0.234107	0.250984		0.600354
PLD3	-0.280018	0.113207		0.946128
SRSF1	-0.54039	0.00111826		2.95146
CDK5R1	0.749012	0.00494428		2.3059
ZDHHC4	0.0377029	0.937379		0.0280848
BNIP3L	-0.304824	0.0229661		1.63891
RGL2	-0.00692461	0.998035		0.000854425
TARS2	0.197639	0.149564		0.825174
SYTL2	-0.248647	0.477232		0.32127
NECTIN2	-0.184719	0.597011		0.224018
ASAH1	-0.148626	0.322813		0.491049
CD109	0.269487	0.0579054		1.23728
TTC9	0.0852001	0.967445		0.0143739
ULK1	-0.38055	0.0085108		2.07003
LZTS2	-0.528711	0.0752397		1.12355
S1PR3	-0.429323	0.112853		0.947487
SRP72	-0.18984	0.251381		0.599668
PRSS56	0.347366	0.185932		0.730646
SYAP1	0.0364418	0.815056		0.0888125
NUTM2G	0.812052	0.000630159		3.20055
JMJD6	-0.00054801	0.900315		0.0456057
GLOD4	-0.166581	0.267115		0.573302
TOPAZ1	0.744042	0.00750347		2.12474
ZNF358	-0.359968	0.0270985		1.56705
TNC	-1.81243	0.00295441		2.52953
TBC1D3C	0.189002	0.147211		0.832059
SENP7	-0.0355433	0.566158		0.247063
TOR1B	0.163664	0.770302		0.113339
ZNF383	0.460393	0.0293774		1.53199
ARHGEF26	0.284837	0.101546		0.993336
EFNA1	0.563659	0.0362483		1.44071
ONECUT3	0.264464	0.179455		0.746044
C5orf24	-0.281442	0.0819653		1.08637
PRDX5	-0.108406	0.321946		0.492217
RHPN2	0.730696	4.57148e-05		4.33994
DUSP21	-0.22194	0.295787		0.529021
RPL36AL	-0.357847	0.0207733		1.6825
VGLL4	-0.290467	0.119438		0.922858
RASAL3	0.334202	0.10052		0.997748
CIBAR1	0.194468	0.275028		0.560622
EMILIN1	-1.23411	7.48193e-05		4.12599
CACNB3	-0.0180733	0.612201		0.213106
FCGR2B	0.306052	0.339947		0.468588
POLR2C	0.0215099	0.977302		0.00997126
DYNC1LI2	-0.272436	0.113005		0.946903
NICN1	0.54753	0.0062744		2.20243
SFTA2	0.919763	0.128649		0.890592
APOBEC3A_B	-0.470242	0.00882261		2.0544
SYPL1	-0.203972	0.100084		0.999635
MYH14	0.150843	0.55218		0.257919
DCAF16	0.285368	0.274463		0.561516
REXO2	-0.393716	0.0204315		1.6897
SELENOF	-0.575628	3.13286e-05		4.50406
MAF	-0.754796	0.00369689		2.43216
TMED6	0.629371	0.00761414		2.11838
ATP5MC3	-0.39205	0.0164835		1.78295
TMEM165	-0.497197	0.00436725		2.35979
COX7B	0.100276	0.28844		0.539945
ACBD5	0.0461993	0.744682		0.128029
TFE3	0.0901876	0.469906		0.327989
ELK3	-0.12318	0.340413		0.467994
GSPT1	0.0739733	0.557825		0.253502
MAP2	0.30918	0.294454		0.530983
KRTAP5-10	-0.340456	0.294241		0.531297
[truncated: 7,102 more rows]

## Sheet: FIG1D
Control reads												IPF
ROI 1	ROI 2	ROI 3	ROI 4	ROI 5	ROI 6	ROI 7	ROI 8	ROI 9	ROI 10	ROI 11	ROI 12	RO1	RO2	RO3	RO4	RO5	RO6	RO7	RO8	RO9	RO10	RO11	RO12
5.2854	4.80735	3.16993	4.64386	4.64386	4.90689	3.90689	5.32193	5.45943	5.39232	4.64386	5.16993	7.50779	8.0607	9.43671	8.60733	8.55459	7.27612	6.35755	8.51964	7.65821	6.32193	8.52748	6.59991

## Sheet: FIG1E
Control reads												IPF reads
RO1	RO2	RO3	RO4	RO5	RO6	RO7	RO8	RO9	RO10	RO11	RO12	ROI1	ROI2	ROI3	ROI4	ROI5	ROI6	ROI7	ROI8	ROI9	ROI10	ROI11	ROI12
4.75489	3.16993	2.58496	4.16993	3.80735	5.04439	4	5.45943	4.58496	5.32193	4.08746	4.52356	6.79442	5.49185	7.21917	7.73471	7.53138	6.52356	4.80735	6.61471	6.94251	4.24793	6.40939	4

## Sheet: FIG1F
Control reads												IPF reads
RO1	RO2	RO3	RO4	RO5	RO6	RO7	RO8	RO9	RO10	RO11	RO12	ROI1	ROI2	ROI3	ROI4	ROI5	ROI6	ROI7	ROI8	ROI9	ROI10	ROI11	ROI12
3.70044	2.58496	2.58496	3.45943	3.32193	4.85798	3.58496	4.70044	4.64386	5.04439	3.58496	3	6.52356	5.93074	7.8392	7.7879	7.82655	5.64386	4.70044	6.24793	6.45943	4.70044	6.37504	4.24793

## Sheet: FIG1G
Control reads												IPF reads
RO1	RO2	RO3	RO4	RO5	RO6	RO7	RO8	RO9	RO10	RO11	RO12	ROI1	ROI2	ROI3	ROI4	ROI5	ROI6	ROI7	ROI8	ROI9	ROI10	ROI11	ROI12
5.83289	5.04439	4.9542	5.52356	5.04439	5.12928	5.93074	6.87036	6.47573	7.32193	5.85798	6.10852	7.70044	7.72792	8.68299	8.26679	8.25739	7.04439	6.42626	8	8.11374	6.2854	8.31288	6.70044

## Sheet: FIG1H
Control reads												IPF reads
RO1	RO2	RO3	RO4	RO5	RO6	RO7	RO8	RO9	RO10	RO11	RO12	ROI1	ROI2	ROI3	ROI4	ROI5	ROI6	ROI7	ROI8	ROI9	ROI10	ROI11	ROI12
7.27612	6.44294	6.14975	7.31288	6.2854	6.53916	7.24793	7.91289	7.83289	9.04439	7.80735	7.47573	2.80735	3.45943	4.08746	2.80735	2.58496	1.58496	5.16993	6.12928	4.70044	6.02237	6.79442	5.67243

## Sheet: FIG2B
Control reads												IPF reads
RO1	RO2	RO3	RO4	RO5	RO6	RO7	RO8	RO9	RO10	RO11	RO12	ROI1	ROI2	ROI3	ROI4	ROI5	ROI6	ROI7	ROI8	ROI9	ROI10	ROI11	ROI12
12.0146	12.1315	12.1177	12.0975	12.559	12.5338	11.7615	12.1861	12.2651	11.8472	11.7088	11.7448	17.2961	17.0593	16.8395	18.1469	16.2188	17.0399	16.398	16.7863	16.3346	15.8761	16.6915	16.4833

## Sheet: FIG2C
Control reads												IPF reads
RO1	RO2	RO3	RO4	RO5	RO6	RO7	RO8	RO9	RO10	RO11	RO12	ROI1	ROI2	ROI3	ROI4	ROI5	ROI6	ROI7	ROI8	ROI9	ROI10	ROI11	ROI12
12.7532	12.7836	12.2614	12.8003	13.1719	13.4422	12.4678	12.8731	12.3321	12.5778	12.3842	12.6622	16.4833	17.3127	17.0923	17.2871	16.405	16.1294	15.5548	17.0339	16.6238	14.9892	16.8303	15.5643

## Sheet: FIG2F
Contro CTLA4										IPF CTLA4
0.2	0.3	0.1	0.2	0.1	0.1	0.2	0.2	0.1	0.1	0.5	0.4	0.5	0.5	0.4	0.6	0.7	0.6	0.8	0.7	1.1	0.8

## Sheet: FIG2G
Condtrol PDCD1										IPF PDCD1
0.1	0.11	0.1	0.15	0.18	0.28	0.5	0.6	0.6	0.1	0.8	0.7	0.7	0.7	0.5	0.55	0.58	0.42	0.33	0.34	0.33	0.2

[truncated: 12 more sheets: FIG3D, FIG3J, FIG4E, FIG4F, FIG4G, FIG5D-E, FIG5F-I, FIG6C, FIG6E, FIG7C, SUP2, SUP 3]
